# Supplementary material for: Growth mechanism prediction for nanoparticles via structure matching polymerization
Source: Royal Society of Chemistry journal article supplement (doi:10.1039/d3cp04702d), 2023-12-06
Supplement: d3cp04702d1.pdf [file d3cp04702d1.pdf]

Supplementary Material for  
**Growth Mechanism Prediction for Nanoparticles via Structure  
Matching Polymerization**

Yi-Rong Liu,<sup>\*a</sup> Yan Jiang<sup>b</sup>

<sup>a</sup>Public Experimental Teaching Center, Panzhihua University, Panzhihua, Sichuan 61700, China

<sup>b</sup>School of Vanadium and Titanium, Panzhihua University, Panzhihua, Sichuan 61700, China

\*Corresponding authors

E-mail: liuyirong@pzhu.edu.cn

This Supplementary Material (SM) contains additional information on the new computational methods. The cartesian coordinates of new ground state structures for SA-DMA systems and the structure matching combination ( $B_m+B_k$ ) before optimization for  $B_n$  ( $n=2-36$ ) systems were provided at the SM. The flow chart of revised BH and GA based on SMP method were also provided at here.

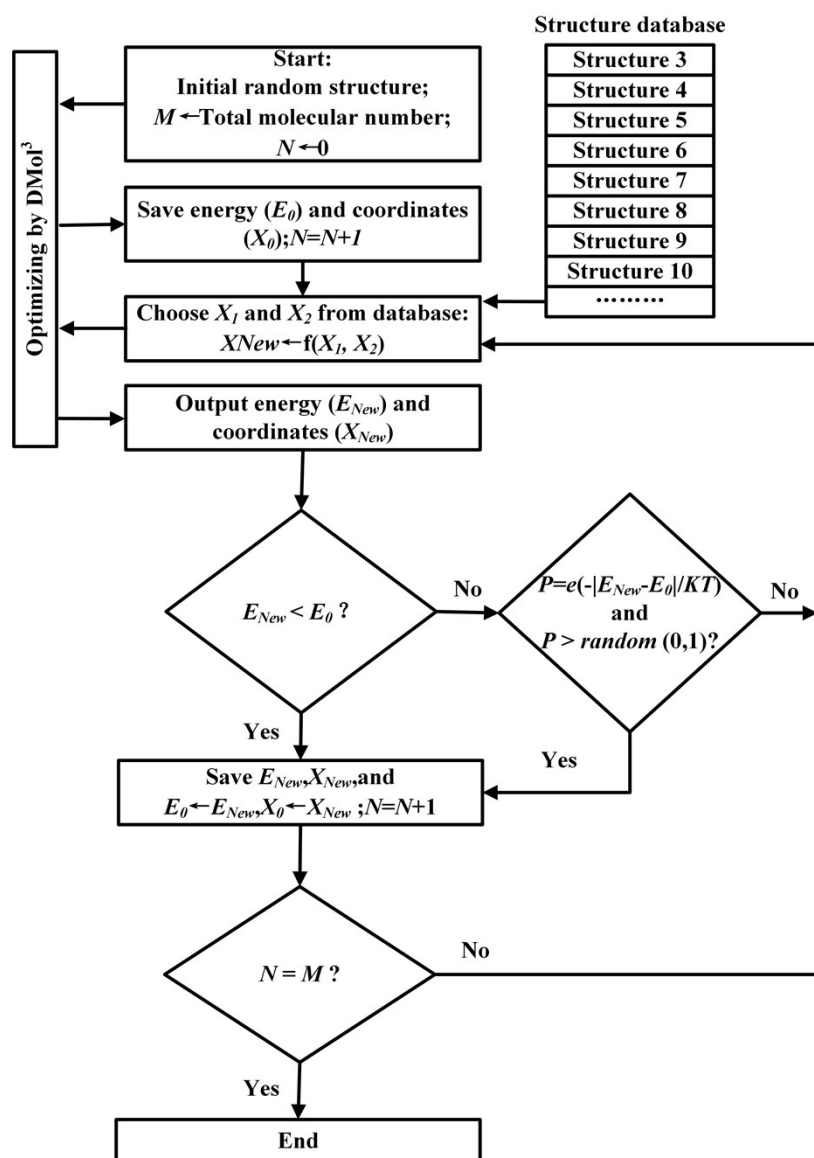

Fig. S1. The flow chart of revised BH based on SMP method. The atomic or molecule movement was replaced by two-body matching polymerization from the structure database.

Note that all matching structures were randomly selected from database.

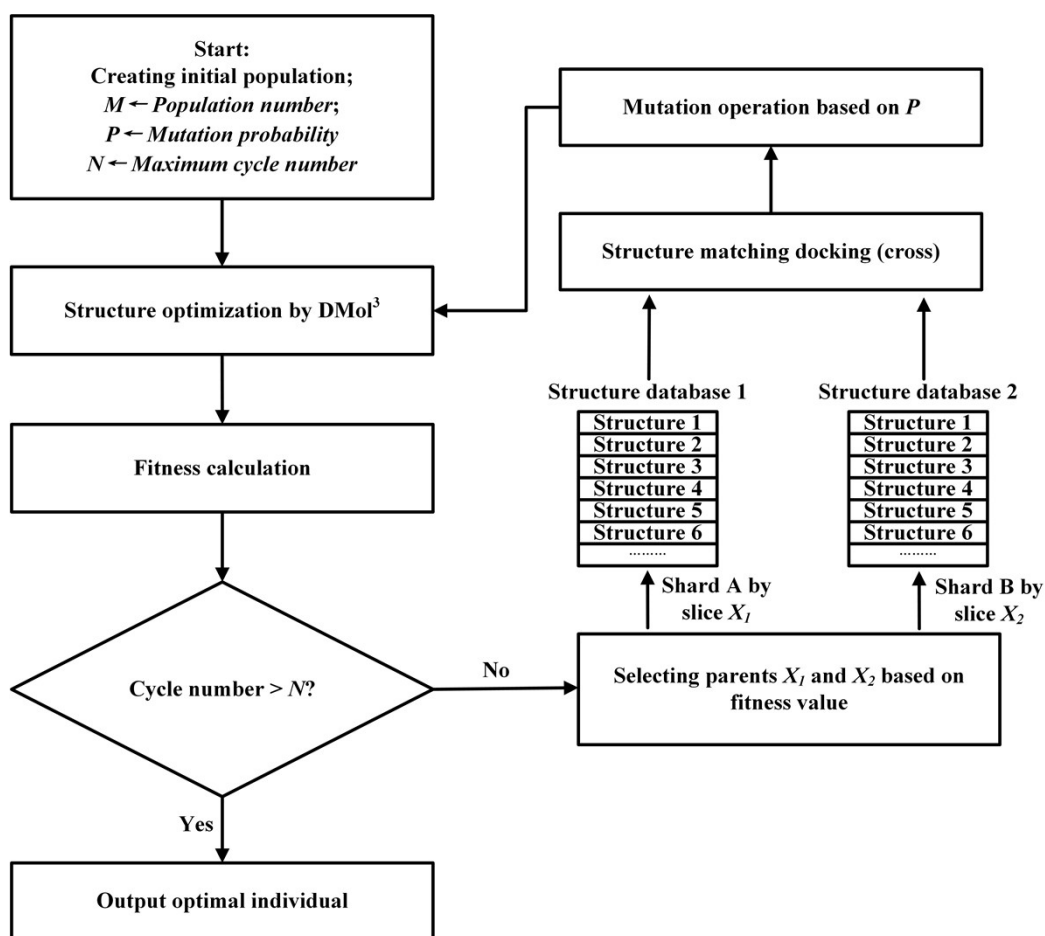

Fig. S2. The flow chart of revised GA based on SMP method. The key cross operation was replaced by SMP, and the fragmentary structure from cutting parent structure was replaced by structure database based on same atomic or molecular number. The two structures from database are connected (cross) based on SMP rules.

## New ground state structures for SA-DMA systems

### 2SA.2DMA

|   |           |           |           |
|---|-----------|-----------|-----------|
| S | 1.311844  | -1.750213 | -0.533975 |
| O | 1.179412  | -1.046971 | 0.779173  |
| O | 2.576625  | -2.393360 | -0.745511 |
| O | 0.101629  | -2.556645 | -0.777637 |
| O | 1.277045  | -0.546960 | -1.632662 |
| H | -1.137313 | -1.942420 | 0.099440  |
| H | 0.365440  | -0.174590 | -1.668408 |
| C | -3.218497 | -1.832304 | 0.091441  |
| N | -1.904751 | -1.597669 | 0.739380  |
| C | -1.720550 | -2.250593 | 2.059039  |
| H | -3.220888 | -1.301534 | -0.858850 |
| H | -4.015517 | -1.451377 | 0.730032  |
| H | -3.351716 | -2.900534 | -0.078318 |
| H | -1.767563 | -0.571570 | 0.841394  |
| H | -0.709424 | -2.030051 | 2.395811  |
| H | -1.840640 | -3.327760 | 1.945671  |
| H | -2.454149 | -1.864180 | 2.766969  |
| S | -1.323787 | 1.697252  | -0.399284 |
| O | -0.167893 | 2.602311  | -0.390794 |
| O | -1.708125 | 1.193010  | 0.918666  |
| O | -2.600310 | 2.614348  | -0.815646 |
| O | -1.225477 | 0.641388  | -1.415858 |
| H | -2.399888 | 3.020094  | -1.670938 |
| H | 1.773189  | 0.448200  | 0.781010  |
| C | 2.145427  | 2.029665  | 2.093848  |
| N | 2.089819  | 1.461249  | 0.725202  |
| C | 3.362541  | 1.522243  | -0.038659 |
| H | 1.151616  | 1.956666  | 2.533102  |
| H | 2.446525  | 3.076185  | 2.045245  |
| H | 2.859352  | 1.464038  | 2.692301  |
| H | 1.329079  | 1.943282  | 0.202113  |
| H | 3.189427  | 1.070094  | -1.013256 |
| H | 4.126547  | 0.955658  | 0.493156  |
| H | 3.674767  | 2.561080  | -0.148257 |

### 2SA.3DMA

|   |           |          |           |
|---|-----------|----------|-----------|
| C | -0.536177 | 3.600811 | -0.307406 |
| N | 0.141914  | 2.480478 | -0.998523 |
| C | 0.943412  | 2.872868 | -2.182679 |
| H | 0.216020  | 4.282676 | 0.089986  |
| H | -1.131664 | 3.186408 | 0.504262  |
| H | -1.184035 | 4.134360 | -1.005104 |

|   |           |           |           |
|---|-----------|-----------|-----------|
| H | -0.567232 | 1.777432  | -1.261219 |
| H | 1.700935  | 3.592596  | -1.871648 |
| H | 0.298300  | 3.319315  | -2.941582 |
| H | 1.433721  | 1.976350  | -2.556534 |
| S | 2.297443  | 0.013589  | 0.061598  |
| O | 1.699166  | -1.167931 | 0.805359  |
| O | 3.742438  | 0.022148  | 0.110286  |
| O | 1.766120  | -0.059119 | -1.360773 |
| O | 1.691093  | 1.263314  | 0.680094  |
| H | 0.865427  | -1.248239 | -1.541361 |
| H | 0.801209  | 1.967051  | -0.292510 |
| C | -0.460355 | -2.049049 | -2.978714 |
| N | 0.201583  | -2.106757 | -1.655218 |
| C | 0.985831  | -3.338443 | -1.399660 |
| H | -1.049879 | -1.134718 | -3.022780 |
| H | -1.115109 | -2.912409 | -3.107453 |
| H | 0.300650  | -2.043872 | -3.759488 |
| H | -0.515606 | -1.978743 | -0.923993 |
| H | 1.457551  | -3.228185 | -0.425257 |
| H | 1.756814  | -3.431149 | -2.164937 |
| H | 0.331913  | -4.211948 | -1.425883 |
| S | -2.354571 | -0.014355 | -0.049304 |
| O | -2.042233 | 0.865475  | 1.085088  |
| O | -1.907794 | -1.393285 | 0.127349  |
| O | -3.977956 | -0.182199 | -0.068178 |
| O | -1.993552 | 0.583145  | -1.342330 |
| H | -4.359923 | 0.695537  | -0.205645 |
| H | 0.730677  | -0.714555 | 1.868439  |
| C | -0.638592 | -1.553488 | 3.240597  |
| N | 0.039887  | -0.379902 | 2.642889  |
| C | 0.797504  | 0.457294  | 3.604310  |
| H | -1.199643 | -2.056242 | 2.455060  |
| H | -1.320317 | -1.229201 | 4.028496  |
| H | 0.112294  | -2.225545 | 3.656666  |
| H | -0.663656 | 0.191073  | 2.148258  |
| H | 1.292218  | 1.241861  | 3.035354  |
| H | 1.550569  | -0.161852 | 4.092159  |
| H | 0.121125  | 0.875184  | 4.352118  |

### 3SA.2DMA

|   |           |          |           |
|---|-----------|----------|-----------|
| S | 0.305583  | 2.815687 | -0.607035 |
| O | 0.341053  | 4.037021 | -1.337894 |
| O | 1.509161  | 2.255060 | -0.035351 |
| O | -0.769877 | 3.018531 | 0.537947  |

|   |           |           |           |
|---|-----------|-----------|-----------|
| O | -0.370055 | 1.690790  | -1.497424 |
| H | -0.844065 | 2.192239  | 1.078442  |
| H | 0.173812  | 0.834569  | -1.486350 |
| S | -0.562618 | -0.484960 | 2.233167  |
| O | 0.860469  | -0.250424 | 2.436203  |
| O | -1.299299 | 0.635758  | 1.619604  |
| O | -0.881661 | -1.761124 | 1.586377  |
| O | -1.234524 | -0.537498 | 3.707349  |
| H | -0.020974 | -2.456404 | 0.216063  |
| H | -0.738633 | -1.178014 | 4.236879  |
| S | 0.369747  | -1.835052 | -1.812634 |
| O | 1.112903  | -2.479262 | -2.851294 |
| O | 0.539022  | -2.793910 | -0.521470 |
| O | 0.956023  | -0.520642 | -1.363580 |
| O | -1.076174 | -1.673570 | -2.027183 |
| H | 2.341140  | -0.316601 | -0.333761 |
| H | -2.138585 | -0.788976 | -1.135086 |
| C | -3.522050 | 0.754836  | -1.385195 |
| N | -2.875073 | -0.302307 | -0.561161 |
| C | -3.804961 | -1.334824 | -0.029559 |
| H | -2.749623 | 1.441865  | -1.723196 |
| H | -4.259498 | 1.283229  | -0.781144 |
| H | -4.006987 | 0.286514  | -2.241072 |
| H | -2.365276 | 0.126465  | 0.232327  |
| H | -4.270324 | -1.856508 | -0.864897 |
| H | -4.566684 | -0.854291 | 0.584260  |
| H | -3.225619 | -2.031128 | 0.573037  |
| C | 3.420888  | -1.714446 | 0.753063  |
| N | 2.957573  | -0.319142 | 0.510736  |
| C | 4.061353  | 0.670251  | 0.372229  |
| H | 4.076745  | -2.013207 | -0.063859 |
| H | 2.553356  | -2.368685 | 0.773393  |
| H | 3.958441  | -1.753685 | 1.699811  |
| H | 2.309766  | -0.048483 | 1.269073  |
| H | 4.681067  | 0.385145  | -0.477456 |
| H | 4.660153  | 0.664388  | 1.283051  |
| H | 3.623180  | 1.650164  | 0.207988  |

### 3SA.3DMA

|   |          |           |           |
|---|----------|-----------|-----------|
| S | 3.251574 | -0.654750 | 0.449502  |
| O | 4.658055 | -0.781369 | 0.685675  |
| O | 2.830598 | -0.749579 | -0.986233 |
| O | 2.568934 | -1.922612 | 1.170826  |
| O | 2.614622 | 0.546906  | 1.047170  |

|   |           |           |           |
|---|-----------|-----------|-----------|
| H | 1.618464  | -1.954673 | 0.900379  |
| H | 1.111132  | 0.551703  | 1.787154  |
| S | -2.021300 | 1.948724  | -0.006256 |
| O | -0.614226 | 2.380583  | -0.088382 |
| O | -3.007388 | 2.982625  | 0.116447  |
| O | -2.354308 | 1.199532  | -1.397388 |
| O | -2.144642 | 0.862929  | 1.031257  |
| H | -1.614447 | 0.558956  | -1.583024 |
| H | -2.935575 | -0.538670 | 0.508919  |
| S | -0.273283 | -1.792646 | -1.070257 |
| O | -0.320015 | -0.452820 | -1.693150 |
| O | -1.449685 | -2.603572 | -1.377407 |
| O | 0.955716  | -2.547170 | -1.729307 |
| O | -0.009484 | -1.708828 | 0.383256  |
| H | 1.769065  | -2.001437 | -1.545085 |
| H | 0.749809  | 1.804303  | -1.119814 |
| C | 1.312069  | 1.740986  | -3.117746 |
| N | 1.629024  | 1.712897  | -1.664593 |
| C | 2.568255  | 2.781346  | -1.229601 |
| H | 0.650232  | 0.906700  | -3.334115 |
| H | 2.238240  | 1.643947  | -3.683673 |
| H | 0.824210  | 2.685130  | -3.358699 |
| H | 2.029843  | 0.780834  | -1.417568 |
| H | 2.104819  | 3.752811  | -1.398315 |
| H | 3.490641  | 2.698493  | -1.803875 |
| H | 2.781497  | 2.630784  | -0.174528 |
| C | -3.552459 | -2.347144 | 1.329191  |
| N | -3.423003 | -1.412233 | 0.181918  |
| C | -4.706295 | -1.028392 | -0.464549 |
| H | -2.550886 | -2.591358 | 1.678588  |
| H | -4.055375 | -3.256360 | 1.001015  |
| H | -4.125477 | -1.868758 | 2.123050  |
| H | -2.783612 | -1.856163 | -0.514593 |
| H | -4.484493 | -0.318951 | -1.259334 |
| H | -5.351075 | -0.554660 | 0.275134  |
| H | -5.189137 | -1.917937 | -0.868430 |
| C | 0.258126  | -0.423268 | 3.404156  |
| N | 0.285966  | 0.688387  | 2.420376  |
| C | 0.400112  | 2.039287  | 3.030098  |
| H | 0.138447  | -1.356981 | 2.860476  |
| H | -0.574411 | -0.275953 | 4.092646  |
| H | 1.199281  | -0.438582 | 3.952291  |
| H | -0.573862 | 0.661564  | 1.832695  |
| H | 1.344589  | 2.108013  | 3.568605  |

|   |           |          |          |
|---|-----------|----------|----------|
| H | -0.436533 | 2.200679 | 3.709619 |
| H | 0.364589  | 2.772081 | 2.227353 |

#### 4SA.1DMA

|   |           |           |           |
|---|-----------|-----------|-----------|
| S | 0.302579  | 2.654666  | -0.576085 |
| O | 0.920076  | 3.917169  | -0.758219 |
| O | 0.949431  | 1.627781  | 0.242122  |
| O | -1.131831 | 2.893923  | 0.035426  |
| O | 0.031722  | 2.051744  | -2.002908 |
| H | -1.505667 | 2.061186  | 0.416151  |
| H | -0.338150 | 1.130159  | -1.964779 |
| S | 3.790227  | -0.513403 | 0.280457  |
| O | 5.181563  | -0.748909 | 0.417988  |
| O | 2.872079  | -0.854782 | 1.357825  |
| O | 3.599767  | 1.017297  | -0.053932 |
| O | 3.305412  | -1.258735 | -1.026093 |
| H | 2.654313  | 1.285439  | 0.054607  |
| H | 2.327223  | -1.383511 | -1.010911 |
| S | -3.440123 | 0.037646  | 0.642555  |
| O | -2.099636 | 0.537322  | 0.992131  |
| O | -4.569733 | 0.568412  | 1.311084  |
| O | -3.611569 | 0.231292  | -0.906138 |
| O | -3.424221 | -1.519021 | 0.850440  |
| H | -2.751082 | 0.042048  | -1.378308 |
| H | -2.771461 | -1.947577 | 0.223521  |
| S | -0.626782 | -1.635750 | -1.502439 |
| O | 0.611065  | -1.488664 | -0.760904 |
| O | -1.208152 | -0.335417 | -1.937963 |
| O | -0.174986 | -2.401797 | -2.835240 |
| O | -1.640069 | -2.465594 | -0.848575 |
| H | -0.955554 | -2.594627 | -3.376479 |
| H | -0.459240 | -0.221924 | 1.604184  |
| C | 0.496402  | 0.269664  | 3.364541  |
| N | 0.273673  | -0.630231 | 2.197847  |
| C | -0.104850 | -2.027789 | 2.550553  |
| H | 0.755501  | 1.255469  | 2.984118  |
| H | 1.317451  | -0.125019 | 3.960328  |
| H | -0.415785 | 0.321689  | 3.957308  |
| H | 1.148771  | -0.657971 | 1.641472  |
| H | -0.225250 | -2.589267 | 1.626679  |
| H | -1.039754 | -2.016716 | 3.109115  |
| H | 0.691898  | -2.465714 | 3.149354  |

#### 4SA.2DMA



|   |           |           |           |
|---|-----------|-----------|-----------|
| S | 4.228417  | -0.238587 | 0.285704  |
| O | 3.373637  | 0.864496  | -0.125384 |
| O | 5.479814  | 0.027491  | 0.901240  |
| O | 3.391563  | -1.166504 | 1.253067  |
| O | 4.499788  | -1.149580 | -0.972339 |
| H | 2.459233  | -1.251263 | 0.916017  |
| H | 3.637841  | -1.435539 | -1.375529 |
| S | -2.597633 | 1.357291  | -1.243285 |
| O | -3.245747 | 0.804595  | -0.050709 |
| O | -1.575087 | 2.365399  | -0.972568 |
| O | -2.145554 | 0.314380  | -2.178424 |
| O | -3.825858 | 2.115129  | -1.974324 |
| H | -0.522674 | -0.045259 | -2.094906 |
| H | -3.494939 | 2.497005  | -2.799886 |
| S | -1.382124 | 0.252236  | 2.664946  |
| O | -0.220353 | 0.619598  | 1.634665  |
| O | -1.927748 | -1.026456 | 2.245944  |
| O | -0.924537 | 0.425203  | 4.000372  |
| O | -2.407953 | 1.396956  | 2.366381  |
| H | -1.755550 | -2.426801 | -0.580982 |
| H | -2.789995 | 1.269201  | 1.449079  |
| S | 0.791427  | -1.545821 | -1.244381 |
| O | -0.338719 | -2.426704 | -1.524570 |
| O | 2.065755  | -1.954510 | -1.801188 |
| O | 0.457140  | -0.135402 | -1.927956 |
| O | 0.906991  | -1.251626 | 0.220935  |
| H | 0.169854  | 2.216723  | -0.476821 |
| H | 0.114946  | -0.185063 | 1.139670  |
| C | -3.790086 | -2.403336 | -0.995447 |
| N | -2.648933 | -2.473072 | -0.040481 |
| C | -2.620022 | -3.693635 | 0.812785  |
| H | -3.665194 | -1.512511 | -1.605431 |
| H | -4.723251 | -2.353456 | -0.436076 |
| H | -3.773943 | -3.293560 | -1.623306 |
| H | -2.642906 | -1.651878 | 0.583414  |
| H | -2.511181 | -4.568897 | 0.173927  |
| H | -3.545107 | -3.754184 | 1.384359  |
| H | -1.774983 | -3.613051 | 1.492430  |
| C | 1.626701  | 3.054458  | -1.674581 |
| N | 1.163559  | 2.487221  | -0.377642 |
| C | 1.304965  | 3.407454  | 0.785349  |
| H | 1.488149  | 2.295720  | -2.441513 |
| H | 2.682359  | 3.305228  | -1.589980 |
| H | 1.035786  | 3.939526  | -1.905311 |

|   |          |          |           |
|---|----------|----------|-----------|
| H | 1.725401 | 1.641173 | -0.196801 |
| H | 0.714324 | 4.303615 | 0.600724  |
| H | 2.356959 | 3.660305 | 0.906823  |
| H | 0.936700 | 2.892687 | 1.669440  |

#### 4SA.3DMA

|   |           |           |           |
|---|-----------|-----------|-----------|
| S | -4.767861 | -0.817303 | -0.502366 |
| O | -6.016461 | -0.931299 | -1.170582 |
| O | -4.274706 | 0.496353  | -0.115844 |
| O | -4.826863 | -1.723898 | 0.783435  |
| O | -3.664423 | -1.498860 | -1.402346 |
| H | -3.941625 | -1.739099 | 1.243076  |
| H | -2.758509 | -1.351570 | -0.996507 |
| S | 4.311428  | -0.212272 | -0.829625 |
| O | 5.688742  | -0.513905 | -1.074461 |
| O | 4.057454  | 0.757045  | 0.287761  |
| O | 3.778174  | 0.524244  | -2.156107 |
| O | 3.427471  | -1.390360 | -0.630955 |
| H | 2.868580  | 0.862388  | -1.973498 |
| H | 1.890538  | -1.531422 | -1.288592 |
| S | -1.199374 | -1.196970 | 1.208961  |
| O | 0.104941  | -1.734422 | 1.593842  |
| O | -2.355724 | -1.838236 | 1.813410  |
| O | -1.263089 | 0.312231  | 1.721579  |
| O | -1.315690 | -1.122191 | -0.283576 |
| H | -0.399125 | 0.766718  | 1.462537  |
| H | -1.543373 | 2.730948  | -0.159383 |
| S | 1.128475  | 2.119656  | -0.240819 |
| O | 0.958723  | 1.378282  | 1.034836  |
| O | 0.100837  | 3.140931  | -0.428037 |
| O | 2.490538  | 2.916129  | -0.094205 |
| O | 1.271506  | 1.205520  | -1.384516 |
| H | 3.211625  | 2.241347  | 0.043483  |
| H | 1.743177  | -0.901325 | 1.913121  |
| C | 2.512228  | 0.208151  | 3.480263  |
| N | 2.677890  | -0.654180 | 2.279184  |
| C | 3.441126  | -1.907324 | 2.529449  |
| H | 1.967955  | 1.099789  | 3.179868  |
| H | 3.497219  | 0.478136  | 3.859704  |
| H | 1.955577  | -0.339480 | 4.240207  |
| H | 3.154221  | -0.105879 | 1.526275  |
| H | 2.894396  | -2.521624 | 3.244001  |
| H | 4.422659  | -1.650093 | 2.926181  |
| H | 3.556000  | -2.424325 | 1.580061  |

|   |           |           |           |
|---|-----------|-----------|-----------|
| C | -2.989924 | 3.179266  | 1.270596  |
| N | -2.581284 | 2.656943  | -0.063346 |
| C | -3.207841 | 3.362984  | -1.214682 |
| H | -2.516892 | 2.565049  | 2.033588  |
| H | -4.072293 | 3.104564  | 1.360373  |
| H | -2.666283 | 4.215369  | 1.360478  |
| H | -2.862358 | 1.664481  | -0.105853 |
| H | -2.820501 | 2.932403  | -2.136361 |
| H | -2.947730 | 4.419487  | -1.167911 |
| H | -4.286686 | 3.227114  | -1.168335 |
| C | 0.918642  | -1.499308 | -3.131102 |
| N | 0.988500  | -1.880064 | -1.695251 |
| C | 0.920721  | -3.343889 | -1.441651 |
| H | 0.910535  | -0.413963 | -3.193328 |
| H | 0.007206  | -1.907703 | -3.567720 |
| H | 1.792591  | -1.895244 | -3.646602 |
| H | 0.212003  | -1.427615 | -1.177681 |
| H | 1.786604  | -3.824300 | -1.894963 |
| H | -0.000559 | -3.742772 | -1.865040 |
| H | 0.925486  | -3.499835 | -0.364810 |

#### 4SA.4DMA

|   |           |           |           |
|---|-----------|-----------|-----------|
| S | 3.911153  | 0.296477  | 0.069998  |
| O | 5.070019  | 0.763299  | 0.772866  |
| O | 3.975999  | -1.055004 | -0.500850 |
| O | 2.725639  | 0.234856  | 1.198476  |
| O | 3.364264  | 1.262431  | -0.938264 |
| H | 1.878078  | 0.162363  | 0.688634  |
| H | 1.326900  | -2.944675 | 0.225945  |
| C | 2.948609  | -3.813245 | 1.149569  |
| N | 2.310433  | -3.170113 | -0.028814 |
| C | 2.317699  | -4.006106 | -1.260001 |
| H | 2.914022  | -3.115024 | 1.983547  |
| H | 3.985938  | -4.045052 | 0.911860  |
| H | 2.399977  | -4.718710 | 1.404226  |
| H | 2.821729  | -2.281003 | -0.226774 |
| H | 1.854062  | -3.430870 | -2.057420 |
| H | 1.749875  | -4.917478 | -1.075113 |
| H | 3.348420  | -4.247241 | -1.517636 |
| S | 0.266075  | -0.125167 | -1.670999 |
| O | 0.366855  | -1.573741 | -1.892724 |
| O | -0.995062 | 0.439666  | -2.163935 |
| O | 0.529376  | 0.251990  | -0.267915 |
| O | 1.389627  | 0.568080  | -2.552096 |

|   |           |           |           |
|---|-----------|-----------|-----------|
| H | -0.978850 | 1.066274  | 1.777796  |
| H | 2.220512  | 0.710327  | -2.012272 |
| S | -1.999569 | 2.995266  | 0.160195  |
| O | -2.980503 | 1.891961  | 0.228831  |
| O | -2.514676 | 4.322179  | 0.345137  |
| O | -0.831124 | 2.675060  | 1.045440  |
| O | -1.407591 | 2.975993  | -1.338458 |
| H | 0.767542  | 2.942392  | 0.368731  |
| H | -1.273635 | 2.040532  | -1.642734 |
| S | -1.583094 | -3.081742 | 0.622695  |
| O | -2.328668 | -4.212064 | 1.097267  |
| O | -0.196614 | -2.956353 | 1.106412  |
| O | -1.501684 | -3.264276 | -0.976055 |
| O | -2.295073 | -1.770096 | 0.812764  |
| H | -0.848286 | -2.615573 | -1.346870 |
| H | -3.221646 | -1.055350 | -0.424192 |
| C | -0.080441 | -0.211638 | 3.175521  |
| N | -1.239274 | 0.242460  | 2.363800  |
| C | -2.423587 | 0.619660  | 3.180666  |
| H | -0.382727 | -1.069065 | 3.775448  |
| H | 0.245393  | 0.602908  | 3.822236  |
| H | 0.725818  | -0.506298 | 2.511396  |
| H | -1.520699 | -0.523695 | 1.710148  |
| H | -2.135478 | 1.395656  | 3.889329  |
| H | -2.786087 | -0.259992 | 3.711472  |
| H | -3.185001 | 1.008714  | 2.509141  |
| C | -3.882133 | -0.771117 | -2.398555 |
| N | -3.868630 | -0.422457 | -0.951592 |
| C | -5.201133 | -0.489707 | -0.297568 |
| H | -2.876312 | -0.637541 | -2.788119 |
| H | -4.576630 | -0.109996 | -2.917256 |
| H | -4.199155 | -1.807672 | -2.508211 |
| H | -3.474233 | 0.526160  | -0.789626 |
| H | -5.087588 | -0.224078 | 0.750930  |
| H | -5.589470 | -1.504261 | -0.379448 |
| H | -5.877236 | 0.213860  | -0.782038 |
| C | 1.587446  | 4.362539  | -0.904063 |
| N | 1.722226  | 3.282126  | 0.111873  |
| C | 2.423473  | 3.697530  | 1.357384  |
| H | 1.029121  | 3.970207  | -1.750643 |
| H | 2.581136  | 4.683209  | -1.214736 |
| H | 1.036158  | 5.194412  | -0.467697 |
| H | 2.257363  | 2.490729  | -0.303336 |
| H | 1.838975  | 4.470849  | 1.853953  |

H 3.414348 4.070788 1.101950  
H 2.525483 2.823406 1.997412

**Structure matching combination ( $B_m+B_k$ ) before optimization for  $B_n$  (n=2-36) systems**

structure matching polymerization for boron cluster 10\_1-9

|   |                |                  |                 |
|---|----------------|------------------|-----------------|
| B | -0.44170845406 | -0.206390428604  | 0.50995383985   |
| B | 0.747864977275 | -1.08407548447   | -2.01829098714  |
| B | 1.47347595806  | 2.6142179014     | -2.19441703426  |
| B | 2.08205479583  | -0.419250624962  | -1.35412878879  |
| B | 1.92908113569  | 1.13101940075    | -1.77985600043  |
| B | 0.713466825933 | -0.669710569187  | -0.501203638527 |
| B | 1.50409003555  | 2.27136668593    | -0.641106512735 |
| B | 1.51952086481  | -0.0457278581317 | -3.01960350782  |
| B | 1.56458085722  | 1.53148482665    | -3.35640658406  |
| B | 1.45674082608  | 0.740725996131   | -0.132995653812 |

structure matching polymerization for boron cluster 10\_2-8

|   |                 |                 |                  |
|---|-----------------|-----------------|------------------|
| B | 0.0723563245267 | 0.0104843313112 | -0.665486901837  |
| B | -0.384115131358 | -1.43588517952  | -0.0833222147986 |
| B | 1.46102548068   | 0.212368376509  | 0.121859495956   |
| B | 0.804018695466  | 2.94042387976   | -0.0677331647965 |
| B | 1.63230632011   | 1.68481008943   | -0.405883973158  |
| B | -0.700011209551 | 0.403491789357  | 1.82271892493    |
| B | 0.421664553485  | -0.350468088892 | 1.11340586926    |
| B | -0.393326041678 | 3.0471436702    | 0.872942978318   |
| B | -1.06917214652  | 1.91925711793   | 1.71975773394    |
| B | 0.307132069816  | 1.4070376328    | 0.740309113373   |

structure matching polymerization for boron cluster 10\_3-7

|   |                 |                 |                  |
|---|-----------------|-----------------|------------------|
| B | -0.140196906604 | -1.4291953993   | 0.310492678659   |
| B | -0.225720549497 | -0.160204902923 | -0.596449499242  |
| B | 1.16831804463   | -0.779937120412 | -0.256872755086  |
| B | 1.25273781813   | 0.823043833175  | -0.0323098685699 |
| B | -1.18675723645  | 0.565907420683  | 1.4003357521     |
| B | -1.92648653048  | 1.75364059397   | 0.716069918458   |
| B | -1.30204894407  | 1.86582044611   | -0.706486969069  |
| B | 0.367826629152  | 0.11124122778   | 1.03317300255    |
| B | 0.252609108898  | 1.4099855934    | -1.07168815814   |
| B | -0.20786356404  | 1.59054058132   | 0.521288747257   |

structure matching polymerization for boron cluster 10\_4-6

|   |                 |                  |                 |
|---|-----------------|------------------|-----------------|
| B | -0.687008484246 | -0.0911935752986 | 0.267898800828  |
| B | 0.295036697795  | 1.11836048548    | 0.0161651033263 |

|   |                 |                 |                 |
|---|-----------------|-----------------|-----------------|
| B | 0.263911674985  | -0.861281397154 | 1.26455317076   |
| B | 1.24595685703   | 0.348272663629  | 1.01281947325   |
| B | -0.416218934087 | -1.79861555458  | -2.07088405764  |
| B | -0.146360413664 | -0.430881436415 | -2.81030644725  |
| B | -1.19298477328  | -1.93191864683  | -0.736975604003 |
| B | -0.996287585912 | -0.305238779288 | -1.28266749749  |
| B | -0.548524900346 | 1.02785818979   | -2.39970166675  |
| B | -1.20892131396  | 1.36481899604   | -1.03161798514  |

structure matching polymerization for boron cluster 10\_5-5

|   |                 |                 |                 |
|---|-----------------|-----------------|-----------------|
| B | -0.852650466648 | 0.0244455120301 | 0.83789000738   |
| B | 0.11361459448   | -0.715404028635 | -0.220984093582 |
| B | -0.432705971664 | -0.407848988999 | -1.8417842681   |
| B | 0.838043379608  | -1.29451989432  | -1.54065869045  |
| B | -1.26526157219  | 0.241520424581  | -0.670194262857 |
| B | -0.780917625787 | 0.801808960509  | 2.26007955646   |
| B | 0.541492764376  | 0.391862400119  | 1.43216986907   |
| B | 1.70817164981   | 1.67815155943   | 1.49827619298   |
| B | 1.9866276041    | 0.334526959135  | 0.718019160563  |
| B | 0.345055285525  | 1.90809382435   | 2.257547512     |

structure matching polymerization for boron cluster 11\_1-10

|   |                  |                 |                 |
|---|------------------|-----------------|-----------------|
| B | -0.0848567059972 | 0.0410945976871 | -0.132526068684 |
| B | 0.546775006393   | 0.125634954612  | 1.30828805878   |
| B | 1.24576230575    | -1.4344553855   | 3.80410413953   |
| B | 2.61938577211    | -1.96644933291  | 3.48638120135   |
| B | 3.15340662161    | -0.98985771371  | 0.9208362276    |
| B | 1.90868582445    | -0.988944488001 | 2.20232520269   |
| B | -0.859968975356  | 1.00612328779   | 0.943799727599  |
| B | 3.48028512487    | -1.77431888129  | 2.20299175309   |
| B | 1.90372327596    | -0.211282172042 | 0.602949165737  |
| B | -0.804328268113  | 0.325292976304  | 2.29115151081   |
| B | 0.176541922479   | -0.566727196673 | 3.118364609     |

structure matching polymerization for boron cluster 11\_2-9

|   |                  |                 |                  |
|---|------------------|-----------------|------------------|
| B | -1.26041960129   | 0.269388288591  | 0.0796421314503  |
| B | -0.0780010685169 | -0.840267473632 | -0.0194395391747 |
| B | 2.44791820965    | -0.039363542381 | 1.45790838347    |
| B | 3.60811828235    | 1.77408085114   | -1.64052039105   |
| B | 1.68702773829    | 1.28305023096   | 0.878742177492   |
| B | 2.6205365904     | 1.68123969585   | -0.377437795733  |
| B | 1.22551332788    | -0.232435664025 | 0.486885726662   |
| B | 2.08729669975    | 1.40960562078   | -1.93295375837   |
| B | 3.4702008729     | 1.17975977235   | 1.07722233716    |

|   |               |                |                 |
|---|---------------|----------------|-----------------|
| B | 4.27604902392 | 1.75468367908  | -0.196801927553 |
| B | 1.14289143751 | 0.814308446687 | -0.768050548217 |

structure matching polymerization for boron cluster 11\_3-8

|   |                    |                |                  |
|---|--------------------|----------------|------------------|
| B | -1.0164796887      | -0.50203486716 | -0.119363874678  |
| B | 0.344111895403     | 0.165693211697 | 0.258954828849   |
| B | 0.284175857541     | -1.37062175946 | -0.0218795872328 |
| B | 1.45062790976      | 3.90467993844  | -0.105513031772  |
| B | -1.36646868862     | 2.80190958658  | -1.00270332338   |
| B | -1.7271724602      | 1.33897589959  | -0.852832524449  |
| B | 2.61656329882      | 3.13594087664  | 0.515572596676   |
| B | 2.66822217043      | 1.62842238934  | 0.842590104496   |
| B | 1.22094398624      | 2.18996043313  | 0.151327256397   |
| B | -0.286499119456    | 1.6551539841   | -0.342080483627  |
| B | -0.000959859813056 | 3.4633467875   | -0.593714977264  |

structure matching polymerization for boron cluster 11\_4-7

|   |                 |                  |                 |
|---|-----------------|------------------|-----------------|
| B | -1.28325717543  | -0.0358584291892 | -0.771695029019 |
| B | -0.242245959092 | 1.09943632149    | -0.427885348345 |
| B | -0.213638718189 | -1.18342207295   | -0.943794927784 |
| B | 0.827372498148  | -0.0481273222689 | -0.59998524711  |
| B | 1.86014125219   | 0.505594354097   | 0.735608465838  |
| B | 0.265720364375  | -1.2927631224    | 2.25002622511   |
| B | -0.432326821925 | -0.217442005071  | 3.13464132265   |
| B | -0.463350056873 | 1.07576735868    | 2.26698827149   |
| B | 1.38625657863   | -0.938052651068  | 1.07663801105   |
| B | 0.657844313701  | 1.4282903831     | 1.09362997849   |
| B | 0.966142886638  | 0.219802316876   | 2.2012035386    |

structure matching polymerization for boron cluster 11\_5-6

|   |                  |                  |                 |
|---|------------------|------------------|-----------------|
| B | -0.768612496276  | -1.0066059157    | 1.37637628218   |
| B | -0.205796595046  | -0.159893837343  | 0.123947924731  |
| B | 0.110384744429   | 1.47922508882    | 0.607029673075  |
| B | 0.367577998749   | 0.976354747368   | -0.866957732314 |
| B | -0.449296975207  | 0.502474152829   | 1.71164118189   |
| B | 0.0667479890986  | -2.18118665523   | -0.800519438486 |
| B | -0.629266793193  | -1.35837243195   | -1.93242215484  |
| B | 1.46025203937    | -1.86821247808   | -0.212145764349 |
| B | 0.934608812284   | -0.807801215891  | -1.44662250731  |
| B | -0.0826176647384 | -0.0989562943173 | -2.6792623934   |
| B | 1.28705640062    | 0.561850370846   | -2.40801639854  |

structure matching polymerization for boron cluster 12\_1-11

|   |                |                |                |
|---|----------------|----------------|----------------|
| B | 0.319729250776 | 0.382842485738 | 0.291651155153 |
|---|----------------|----------------|----------------|

|   |                 |                 |                 |
|---|-----------------|-----------------|-----------------|
| B | -3.00356656405  | -1.86779442077  | -2.09950613342  |
| B | -0.848632817994 | -0.656940110013 | 0.144969643166  |
| B | -2.08462662439  | -2.57559992016  | -3.22059160201  |
| B | 0.313309929548  | -2.15780131463  | -1.84989099529  |
| B | -2.44732459373  | -0.266844381941 | 0.140490856523  |
| B | 0.478880475631  | -0.990925817411 | -0.730941533348 |
| B | -0.555149278651 | -2.22294813157  | -0.406293531168 |
| B | -0.539532042916 | -2.73119997752  | -3.13519258114  |
| B | -2.15052031179  | -1.77065788537  | -0.498761057116 |
| B | -1.43083016252  | -2.70058445006  | -1.73416565259  |
| B | -3.42281805715  | -0.84681480475  | -0.922986394725 |

structure matching polymerization for boron cluster 12\_2-10

|   |                |                 |                  |
|---|----------------|-----------------|------------------|
| B | 0.517844322056 | 0.743816318891  | 0.222231932699   |
| B | -1.00455998595 | 0.24070364379   | -0.0393582694079 |
| B | 0.662439323282 | -3.69105579579  | 1.41506058803    |
| B | 0.69136727103  | -0.998670734452 | 0.45804917343    |
| B | 1.26981913053  | -1.78271562862  | -1.03328892027   |
| B | 1.04839569963  | -0.166065885759 | -0.887724317527  |
| B | 1.57288246794  | -0.830514167398 | -2.25493798447   |
| B | 1.1869260916   | -4.35550407743  | 0.0478469210906  |
| B | 1.5439545202   | -3.52289922874  | -1.29792656987   |
| B | 0.965502660694 | -2.73885433457  | 0.193411523838   |
| B | 1.80621968191  | -2.40973172945  | -2.44852707627   |
| B | 0.429102109317 | -2.11183823374  | 1.60864967984    |

structure matching polymerization for boron cluster 12\_3-9

|   |                 |                  |                 |
|---|-----------------|------------------|-----------------|
| B | -0.306456112059 | 0.615762033279   | -0.431310053302 |
| B | 0.582109287607  | 0.131175099675   | 0.758573269446  |
| B | 0.386803873182  | -0.78837246727   | -0.49003077336  |
| B | -3.36198667106  | -0.0163273322497 | -1.10772507613  |
| B | -0.843060450458 | 0.305317541885   | 1.68269799537   |
| B | -3.71592961304  | -0.389745403256  | 0.440967704744  |
| B | -2.29796133354  | -0.14694031346   | 1.1747206596    |
| B | -4.02124901751  | 1.08196127632    | -0.194724073947 |
| B | -2.08286239688  | 1.18275409573    | 2.15625261903   |
| B | -2.22195233309  | -0.944335600446  | -0.389833908635 |
| B | -0.901336258775 | -0.781738926408  | 0.522636405383  |
| B | -3.47855931795  | 1.1429601346     | 1.34771934264   |

structure matching polymerization for boron cluster 12\_4-8

|   |                 |                 |                 |
|---|-----------------|-----------------|-----------------|
| B | -0.680913644463 | 0.435726471883  | -0.228395119351 |
| B | -1.16307561036  | -0.600101963044 | 0.858924869993  |
| B | -0.340300433747 | -0.642217843397 | -1.32826063887  |



|   |                 |                 |                 |
|---|-----------------|-----------------|-----------------|
| B | -0.82246239964  | -1.67804627832  | -0.240940649526 |
| B | 2.56980476069   | 2.1865684824    | 0.140985065726  |
| B | 0.746243050938  | 1.06939652588   | 2.46125134855   |
| B | -0.310324344837 | 0.0168617721277 | 2.1993747172    |
| B | 2.56440484151   | 1.80273067739   | -1.33845801016  |
| B | 1.64940935248   | 0.768648919034  | -2.02815305225  |
| B | 1.41223258249   | 0.974135513341  | -0.358031535248 |
| B | 0.469425871184  | 0.416013139814  | 0.907459979556  |
| B | 1.70887825585   | 1.6985859677    | 1.39034560659   |

structure matching polymerization for boron cluster 12\_6-6

|   |                 |                  |                 |
|---|-----------------|------------------|-----------------|
| B | 1.89954590428   | -0.756783509122  | -0.381680296402 |
| B | 0.811260583597  | -1.65154341127   | -1.09252872439  |
| B | 1.6215632499    | 0.643561764259   | 0.220154735156  |
| B | 0.256301148518  | -0.0794654592063 | -0.551757077327 |
| B | -0.704835078035 | -1.35978793434   | -1.36563409538  |
| B | -1.36425503962  | 0.0168677141795  | -1.06346939265  |
| B | -1.01336019725  | 1.7736002275     | 0.0263693801444 |
| B | 0.18719788895   | 1.74261997405    | 1.02655140761   |
| B | -2.28560692347  | 0.906156901687   | 0.14851805277   |
| B | -1.12228033448  | 0.67252296135    | 1.38009919315   |
| B | 0.348162657632  | 0.860837603369   | 2.30689308594   |
| B | -0.694482263317 | -0.161786700003  | 2.81025973832   |

structure matching polymerization for boron cluster 13\_1-12

|   |                 |                  |                 |
|---|-----------------|------------------|-----------------|
| B | 0.145894437762  | 0.120663076279   | -0.539796038518 |
| B | -2.63040769864  | -0.490157100249  | 1.43526297229   |
| B | 1.02356570683   | -2.45318672156   | 0.0940284187521 |
| B | -1.72383906572  | 1.86792453463    | 2.49850229757   |
| B | 2.09672836206   | -1.43951625846   | 0.470769013123  |
| B | -0.218856825924 | 1.77039551058    | 2.29097481711   |
| B | -0.481249136478 | -2.3544025098    | 0.302624504012  |
| B | 1.92719478899   | -0.0866117246574 | 1.14799196396   |
| B | 0.398135594456  | -0.940991496805  | 0.896840070556  |
| B | -1.10221087749  | 0.358474146186   | 1.69133823408   |
| B | -1.56689230479  | -1.43258551899   | 0.865097453223  |
| B | -2.80133101144  | 0.86116746425    | 2.11542268759   |
| B | 0.880002876674  | 0.866543605999   | 1.72765291611   |

structure matching polymerization for boron cluster 13\_2-11

|   |                 |                 |                 |
|---|-----------------|-----------------|-----------------|
| B | -1.37879166923  | -0.229639451529 | -0.86399283329  |
| B | 0.165664179606  | -0.205167778956 | -0.360679866069 |
| B | -0.698253943414 | 0.793469630122  | 0.736942897598  |
| B | -0.177757316478 | 0.180069269477  | 2.07932540052   |

|   |                 |                  |                 |
|---|-----------------|------------------|-----------------|
| B | 3.41185510536   | 0.55607973206    | 1.43117172183   |
| B | 1.77297918665   | 0.17360933802    | 2.17915392306   |
| B | 2.75115908418   | 1.14896370908    | 0.126563037028  |
| B | 0.0177704173097 | 1.3801169933     | -0.491452939476 |
| B | 1.55857367251   | 1.53220409906    | -0.750251894396 |
| B | 0.594835211823  | -0.382121887923  | 3.32008364026   |
| B | 1.02837845847   | 0.838963225322   | 0.716609777747  |
| B | 3.33463264413   | -0.0889732910123 | 2.81382668877   |
| B | 2.0854076199    | -0.512530575586  | 3.6668288415    |

structure matching polymerization for boron cluster 13\_3-10

|   |                 |                 |                 |
|---|-----------------|-----------------|-----------------|
| B | -1.19148119009  | -0.691833213925 | -0.700010130623 |
| B | 0.150827395479  | 0.105965029665  | -0.656181930852 |
| B | 0.176183162654  | -1.4565503421   | -0.681217636312 |
| B | -0.667066540003 | 0.134156931991  | 0.828616237276  |
| B | 0.716271170487  | 2.77793472497   | 1.32647260129   |
| B | 2.17228220111   | 2.42087169396   | 1.17523942469   |
| B | 2.14871620275   | -0.313413774644 | 0.588430074656  |
| B | 1.06746703753   | 1.06484756156   | 0.940129506736  |
| B | -2.3259363882   | -0.234262511347 | 0.833834477873  |
| B | 2.82266185359   | 1.04507435562   | 0.846058065825  |
| B | 0.677097328677  | -0.634650599019 | 0.594798485932  |
| B | -1.93850907075  | 1.19715849602   | 1.12186756588   |
| B | -0.643232655673 | 2.06306737861   | 1.2419890398    |

structure matching polymerization for boron cluster 13\_4-9

|   |                 |                   |                |
|---|-----------------|-------------------|----------------|
| B | -0.200119588887 | -0.00726331011132 | -0.35027537525 |
| B | -1.06173331968  | -0.553450715982   | -1.64068872405 |
| B | 0.481753127503  | 0.663448719736    | 0.838477362898 |
| B | -0.635098680603 | 1.53070068789     | 0.271733010368 |
| B | 0.775153079212  | -1.30164985787    | -0.29264489462 |
| B | 2.65720627631   | -3.75019544639    | 1.8747050799   |
| B | 1.06409453848   | -1.03009763517    | 1.29037065013  |
| B | 1.81404110406   | -2.39093870918    | 1.73045413325  |
| B | 2.04716862      | -0.470413630016   | 0.114120807801 |
| B | 3.45389472551   | -2.38160638088    | 2.02803230719  |
| B | 0.436994478544  | -2.59045659611    | 0.656497517357 |
| B | 1.17877279733   | -3.87070054461    | 1.29977578234  |
| B | 2.85494260822   | -1.00708840495    | 1.43201535366  |

structure matching polymerization for boron cluster 13\_5-8

|   |                 |                  |                  |
|---|-----------------|------------------|------------------|
| B | 0.500664451283  | -0.261087060181  | -0.831119841395  |
| B | 1.28946297419   | -0.0726881075258 | 0.522570558535   |
| B | -0.582742033374 | 0.982899083707   | -0.0806554359237 |

|   |                 |                 |                  |
|---|-----------------|-----------------|------------------|
| B | 1.53630775133   | 0.929144480964  | -0.783768900103  |
| B | 1.02369434503   | 1.4804189422    | 0.603269514283   |
| B | -1.44739381962  | -0.307686592566 | 0.355176979681   |
| B | -4.00069046621  | -1.42560780727  | 0.730434909468   |
| B | -2.98986810674  | -0.263428064295 | 0.662990477338   |
| B | -0.963821717776 | -2.99275755509  | -0.0398957745303 |
| B | -0.552520970623 | -1.52525566835  | 0.0438116572785  |
| B | -3.73426165667  | -2.91243652242  | 0.510773350038   |
| B | -2.38162553336  | -3.61835443109  | 0.167194120885   |
| B | -2.29447073699  | -1.86446916255  | 0.346615979712   |

structure matching polymerization for boron cluster 13\_6-7

|   |                 |                  |                 |
|---|-----------------|------------------|-----------------|
| B | 1.94505131664   | -0.339486880927  | -0.588064179268 |
| B | 1.1802946696    | -1.32486127186   | -1.55473386938  |
| B | 1.26057455149   | 0.515031314882   | 0.508173412236  |
| B | 0.167659108065  | -0.425901129565  | -0.441952256351 |
| B | -0.351256161773 | -1.64543566855   | -1.65392038208  |
| B | -1.42650938251  | -0.876441746517  | -0.833068491001 |
| B | -0.79250927679  | 1.16974191348    | 1.30292161954   |
| B | -1.30413564298  | 2.72901241197    | 1.30933485406   |
| B | -0.280882910601 | -0.389528585014  | 1.29650838502   |
| B | -1.68832346066  | -0.0327829755892 | 0.679991570048  |
| B | 0.643112460674  | 0.727109225053   | 1.91908518343   |
| B | -2.22813101426  | 1.6123746019     | 0.686758055648  |
| B | 0.103304907082  | 2.37226680255    | 1.92585166903   |

structure matching polymerization for boron cluster 14\_1-13

|   |                 |                 |                  |
|---|-----------------|-----------------|------------------|
| B | 0.685168007565  | -0.482143293983 | -0.0726677588961 |
| B | -0.822665895829 | 1.10228196545   | -1.7027492379    |
| B | -4.48855079164  | 2.52568065775   | 2.26635023156    |
| B | -1.50233348275  | 1.47246323387   | 1.56070011935    |
| B | -2.96917313666  | 1.991206385     | 1.99971142183    |
| B | -2.71847280953  | 1.63111888938   | 0.28974897547    |
| B | -3.80956817034  | 2.15424420656   | -0.997004403374  |
| B | -3.97485523774  | 2.57495892494   | 0.693074266392   |
| B | 0.266114691814  | 0.911717970338  | -0.58678552835   |
| B | -1.15822780731  | 1.57377082425   | -0.151616335176  |
| B | -0.079110837574 | 0.961769162839  | 0.944678154644   |
| B | -5.49527501403  | 2.9562615155    | 1.1405096337     |
| B | -5.23189715249  | 2.66710601958   | -0.38059688182   |
| B | -2.34349770999  | 1.63321879326   | -1.43530246632   |

structure matching polymerization for boron cluster 14\_2-12

|   |                   |                 |                |
|---|-------------------|-----------------|----------------|
| B | -0.00342626690624 | -0.710961337365 | 0.165499333318 |
|---|-------------------|-----------------|----------------|

|   |                  |                 |                 |
|---|------------------|-----------------|-----------------|
| B | 0.479332214972   | 0.677893021134  | 0.856364366285  |
| B | -0.985365601728  | 0.437836689128  | -2.13351819897  |
| B | -3.15193651526   | -0.355389178636 | -5.23658670443  |
| B | -2.19755784424   | 1.50620010647   | -1.4140508866   |
| B | 0.312820971602   | 0.552665071062  | -0.859552931624 |
| B | -0.641557699418  | -1.30892421404  | -4.68208874946  |
| B | -1.85374994193   | -0.240560796702 | -3.96262143708  |
| B | -2.84068879413   | 1.03365503836   | -2.72017329797  |
| B | 0.00157325047731 | -0.836379145933 | -3.37596633808  |
| B | -3.44273358304   | 0.534038484004  | -4.03583932671  |
| B | -1.90237644514   | -1.17764012254  | -5.52508681469  |
| B | 0.603618039383   | -0.336762591579 | -2.06030030934  |
| B | -0.93673909851   | 1.37491601497   | -0.571052821369 |

structure matching polymerization for boron cluster 14\_3-11

|   |                  |                  |                 |
|---|------------------|------------------|-----------------|
| B | -0.0625052004259 | -0.685390895869  | -0.979343001121 |
| B | 0.326525189303   | 0.66060980129    | -0.28859502496  |
| B | 1.03876367575    | -0.664440042409  | 0.135295572518  |
| B | -2.65456659549   | 0.00684940479296 | 2.69819675875   |
| B | -1.35809975871   | -0.768913853706  | 1.96136465905   |
| B | -3.57554896306   | 3.12366182553    | 1.33787594715   |
| B | -1.25380006566   | 0.874381833096   | 2.56469531178   |
| B | -2.04993524998   | 3.07685996121    | 1.06851046765   |
| B | -4.02755294316   | 0.715196196212   | 2.62340002777   |
| B | -4.44836315706   | 2.08142594836    | 2.02439652767   |
| B | 0.115070161916   | -0.941154228125  | 1.54749379895   |
| B | -2.73033285683   | 1.66557006048    | 1.88887634693   |
| B | -0.984648152598  | 2.00137551256    | 1.38617526307   |
| B | -0.312122718968  | 0.480682662653   | 1.13860194627   |

structure matching polymerization for boron cluster 14\_5-9

|   |                  |                  |                  |
|---|------------------|------------------|------------------|
| B | -1.604374871     | -0.460373505673  | 0.161618923919   |
| B | -0.0712187098228 | -0.0754445322383 | 0.483366874527   |
| B | 0.0150983858799  | 1.5343744421     | 1.13227495583    |
| B | 1.30290718207    | 0.645925262845   | 0.922817604646   |
| B | -1.41658711938   | 0.989352153025   | 0.7572017335     |
| B | 1.95004130363    | -1.86789655938   | -0.218025614669  |
| B | 0.959527663743   | -1.42445712721   | -1.86980181927   |
| B | -0.0309859761393 | -0.981017695038  | -3.52157802387   |
| B | 0.457067572223   | -1.78174615454   | 0.00687073465983 |
| B | -0.944043484401  | -1.15639966495   | -2.32880346607   |
| B | -0.741282240641  | -1.4871375882    | -0.86713622384   |
| B | 1.46198775526    | -1.06716809987   | -3.7464743732    |
| B | 2.86309881189    | -1.69251458947   | -1.41080017247   |

B 2.66033756813 -1.36177666622 -2.8724674147

structure matching polymerization for boron cluster 14\_6-8

B 0.310429847513 0.530822606463 0.508324791521  
B -0.501123614247 1.54950469916 -0.501326743709  
B -0.987416448749 0.0193020730066 -0.374242388638  
B 1.80509774609 0.175864305894 -0.119727122014  
B 0.481860360109 -0.689123902951 -0.584707901659  
B 1.14817380431 1.63439277075 -0.386143351374  
B 0.0372999347595 -1.11278046808 0.960371926924  
B -2.63145434676 -1.05686168791 1.84609976126  
B -1.20847651099 -0.484874771903 1.6881839748  
B -0.931977778618 -3.51572865743 0.0191645925859  
B 0.15335545072 -2.4615469536 0.220385225075  
B -3.16948084478 -2.38663515928 1.32444360849  
B -2.41647894319 -3.48846568496 0.508999624255  
B -1.45187661743 -2.07350942801 0.93718514623

structure matching polymerization for boron cluster 14\_7-7

B -0.231370841047 -0.641039423014 0.0407999900104  
B -0.994819120964 -0.178319461272 1.41781274105  
B 0.532077438871 -1.10375938476 -1.33621276103  
B -0.0905140783867 0.342620400695 -1.24339770935  
B 0.433272611903 -2.11290655395 -0.127863096402  
B -0.896014293997 0.830827707927 0.209463076422  
B -0.372227603707 -1.62469924672 1.32499768937  
B 1.04470117449 2.89446429413 -0.184222857513  
B 1.06716333994 2.94119374542 1.4560329046  
B 1.02223900903 2.84773484285 -1.82447861962  
B 0.975251016656 4.24178604853 -1.08782220077  
B 1.09045191535 1.49783915655 -1.01122715145  
B 0.998950433623 4.29108943172 0.642781436428  
B 1.11415133231 1.54714253974 0.719376485739

structure matching polymerization for boron cluster 15\_1-14

B -0.670912138012 0.212158245628 0.0212005498251  
B 3.76584974815 -2.27002223077 -2.31477156405  
B 2.28226280149 -0.961547584905 -0.253961011223  
B 6.37479143333 -2.35770106548 -0.343562120057  
B 6.34610008764 -1.66426859062 1.0480605698  
B 1.06643296813 0.00461036269805 0.108422465033  
B 5.15896159998 -1.39154311787 0.0188213561992  
B 5.14804086795 -2.36599953934 -1.46703497181  
B 3.73612027299 -1.55145946702 -0.870502804198

|   |               |                  |                |
|---|---------------|------------------|----------------|
| B | 2.35803303263 | -1.55929467571   | -1.92642286292 |
| B | 5.08319136884 | -0.793796027065  | 1.6912832079   |
| B | 2.29318353351 | 0.0129088365651  | 1.23189531679  |
| B | 1.09512431383 | -0.688822112162  | -1.28320022482 |
| B | 3.70510412847 | -0.801631235758  | 0.635363149174 |
| B | 3.67537465331 | -0.0830684720049 | 2.07963190903  |

structure matching polymerization for boron cluster 15\_2-13

|   |                 |                  |                 |
|---|-----------------|------------------|-----------------|
| B | 1.05340767541   | 1.17244194594    | 0.31282245618   |
| B | 0.497916505702  | -0.0529186039002 | 1.22341992927   |
| B | -1.51097298442  | -1.32077754022   | -0.700005108573 |
| B | -0.57916508054  | 0.19518892457    | -0.722366790467 |
| B | -3.22404068742  | -3.0386817827    | -3.05526527716  |
| B | -1.52879149446  | -2.00961635407   | 0.781414251151  |
| B | -2.76400337571  | -1.87631239151   | -3.99367504194  |
| B | -2.3581275334   | -2.84617545032   | -0.347902691074 |
| B | -0.769039275952 | -0.711286868989  | 0.621961738201  |
| B | -2.00053608404  | -0.571891364829  | -4.15354855061  |
| B | -1.12804721006  | 0.545171376893   | -3.49537670515  |
| B | -1.42734119003  | -0.509932704473  | -2.2140538458   |
| B | -0.531751532288 | 0.895434282403   | -2.12006770755  |
| B | -2.32780111126  | -2.04886638141   | -2.02553251658  |
| B | -3.08528028608  | -3.46987124588   | -1.58459258966  |

structure matching polymerization for boron cluster 15\_3-12

|   |                 |                 |                 |
|---|-----------------|-----------------|-----------------|
| B | -0.323185470661 | 0.405192632195  | 0.41291196309   |
| B | 0.0470993047331 | 1.04856854322   | -0.961552263318 |
| B | 0.881370411462  | -0.155952992906 | -0.417637216672 |
| B | -1.88808612406  | -1.52192877601  | 1.18758445356   |
| B | 0.567678069203  | -2.87666787989  | 1.2187650445    |
| B | -3.21706597063  | -0.46479016148  | 0.774894424486  |
| B | -2.53033128672  | -3.16095704081  | 0.853412384865  |
| B | 2.50679406054   | -0.929075215752 | 1.04766112457   |
| B | 0.913629861936  | -1.14898089757  | 1.45691263957   |
| B | -1.9519891848   | 0.260036838811  | 1.3098516886    |
| B | -0.472699563643 | -1.89022180273  | 2.10692107168   |
| B | -0.594233425398 | -0.313332420634 | 1.76350014252   |
| B | 2.03982370938   | -2.37364230055  | 0.988506858416  |
| B | -1.04972218016  | -3.23465034256  | 1.30272293312   |
| B | -3.47213681252  | -1.96101887794  | 0.593701778612  |

structure matching polymerization for boron cluster 15\_4-11

|   |                 |                  |                |
|---|-----------------|------------------|----------------|
| B | -0.387021510304 | -1.17824077266   | 0.946750796271 |
| B | 0.381151037866  | -0.0339926301247 | 0.198855458938 |

|   |                 |                 |                 |
|---|-----------------|-----------------|-----------------|
| B | 0.793080495832  | -0.322688139953 | -1.28630760797  |
| B | 0.0249079476615 | -1.46693628248  | -0.538412270641 |
| B | -0.13575307879  | 1.33108211965   | 1.07298756595   |
| B | 0.988440046108  | 1.75755143575   | -0.101936739433 |
| B | -3.1282281923   | 3.19081633021   | 1.10554262484   |
| B | 0.317855851279  | 2.9196320571    | 1.02707439472   |
| B | -2.09626383284  | 4.22334787948   | 0.584454649798  |
| B | -1.57155082335  | 0.935877427726  | 1.49081053124   |
| B | -2.89666238879  | 1.73967158447   | 1.50571384035   |
| B | 2.00410630352   | 2.68759358334   | -0.790994405138 |
| B | -1.46039854345  | 2.61303318299   | 0.941664729356  |
| B | -0.578976472499 | 4.10693160758   | 0.307263170078  |
| B | 0.711084575975  | 3.49716639558   | -0.581266575511 |

structure matching polymerization for boron cluster 16\_3-13

|   |                 |                  |                 |
|---|-----------------|------------------|-----------------|
| B | -1.4349727342   | 1.02499091164    | 0.390161127671  |
| B | 0.0530258320728 | 1.17276324577    | 0.842066971274  |
| B | -0.670678145917 | -0.204605136512  | 0.989826506372  |
| B | 1.24912075162   | -1.37364026616   | 0.740258117583  |
| B | 2.29398608473   | -2.15736317318   | -4.69228837055  |
| B | 1.80239990614   | -0.0377246055243 | -2.2860094569   |
| B | 2.05459116522   | -1.02419928332   | -3.54168108187  |
| B | 1.58150718353   | -1.76857680638   | -2.01243980727  |
| B | 1.73935509717   | -3.49347168835   | -1.66645552421  |
| B | 2.28679755039   | -2.70849819648   | -3.13097250137  |
| B | 1.39740356563   | 0.173723815188   | 0.514848685407  |
| B | 1.79740319688   | -0.814145698124  | -0.718257912794 |
| B | 1.53126987906   | 0.8078966763     | -0.915875394456 |
| B | 2.39511296946   | -3.70071256936   | -4.4197877627   |
| B | 2.01281673658   | -4.33865627218   | -3.03645076375  |
| B | 1.48485724356   | -2.50665790831   | -0.411718629872 |

structure matching polymerization for boron cluster 16\_6-10

|   |                 |                 |                 |
|---|-----------------|-----------------|-----------------|
| B | 1.01254753671   | -1.04907102831  | -0.259678940934 |
| B | 0.431648617157  | 0.294610134421  | -0.952133506831 |
| B | -1.76240474458  | -1.22436223734  | -0.655280752785 |
| B | -0.502821449344 | -0.511126688414 | 0.142029894129  |
| B | -1.20730924362  | 0.201081750199  | -1.16662136797  |
| B | -0.307262232449 | -1.98660258985  | -0.563192130554 |
| B | 2.42272569503   | 1.82583777491   | 0.740769588118  |
| B | 0.529329392987  | 1.87597910381   | 3.57665303685   |
| B | 2.12020982757   | 1.73366259585   | 3.56587419299   |
| B | 0.646204613039  | 2.05871585041   | 0.794619849117  |
| B | 1.4943065944    | 1.69323836272   | -0.572331294654 |

|   |                 |               |                 |
|---|-----------------|---------------|-----------------|
| B | 3.00930228335   | 1.7163615369  | 2.23921434642   |
| B | -0.990123246312 | 1.85216292215 | 0.766594109658  |
| B | -0.387366405934 | 2.00667436237 | 2.25580734652   |
| B | -0.104187720932 | 1.68362863958 | -0.553818335117 |
| B | 1.40920766675   | 2.13325847414 | 2.20015754134   |

structure matching polymerization for boron cluster 17\_1-16

|   |                 |                 |                   |
|---|-----------------|-----------------|-------------------|
| B | 0.443834640171  | 0.710027266211  | -0.641939724044   |
| B | -2.27955655113  | -2.24983720152  | 2.49851324237     |
| B | -2.42603248846  | -2.97661432013  | 1.03053214173     |
| B | -2.02057144469  | -3.38266599345  | 4.01384048435     |
| B | -1.13501881662  | -3.28606677749  | -0.00239201981866 |
| B | -1.82092189955  | -5.50630986404  | 2.16922685429     |
| B | -0.279115899924 | -0.557422478646 | 0.312754781852    |
| B | -1.32906704667  | -1.67060557647  | 1.09000533588     |
| B | -0.672961166935 | 0.535114755998  | 3.18595901205     |
| B | -1.63134460781  | -4.56505935929  | 0.857273114139    |
| B | -1.94723844192  | -4.93453224971  | 3.61767719322     |
| B | -0.470233442443 | -1.88916891486  | -0.413075905741   |
| B | -0.356564610136 | 0.202817333556  | 1.69342862588     |
| B | -2.21114885559  | -3.93168195363  | 2.38249353414     |
| B | -2.01951704354  | -1.74632054645  | 4.14807239161     |
| B | -1.43476779211  | -0.273214929877 | 4.27752799305     |
| B | -1.2206584785   | -0.970314719296 | 2.77259884341     |

structure matching polymerization for boron cluster 17\_2-15

|   |                 |                 |                 |
|---|-----------------|-----------------|-----------------|
| B | 0.641530599708  | 1.078013214     | -1.08136260759  |
| B | 0.390157679808  | 0.489305036633  | 0.411788761754  |
| B | -1.68267689457  | -2.48944588038  | 1.4720020425    |
| B | -2.19087461565  | -4.14069973347  | 1.69379281936   |
| B | -2.18539527767  | -1.31265338846  | -1.52102750949  |
| B | -1.01763963016  | -0.715129287147 | -0.709264435692 |
| B | -3.30218769082  | -4.64124750413  | 0.614898820307  |
| B | -2.72925718743  | -3.14220222301  | 0.378979094888  |
| B | -3.76143504133  | -3.87731157111  | -0.650482040326 |
| B | -0.183181818669 | -2.1017293238   | 2.1172419339    |
| B | 0.234730954388  | -0.470958835197 | 2.20579221855   |
| B | -1.15431972895  | -3.44745799362  | 2.74372472916   |
| B | -3.18699581042  | -2.51179943382  | -1.24546901987  |
| B | -2.14948308932  | -1.55916073386  | 0.116828571194  |
| B | -0.064873033355 | -2.71867880199  | 3.67481749912   |
| B | 0.722866922784  | -1.42017286349  | 3.33351006049   |
| B | -0.622197806117 | -0.807062663492 | 0.878964035137  |



structure matching polymerization for boron cluster 17\_3-14

|   |                 |                  |                 |
|---|-----------------|------------------|-----------------|
| B | -0.006044002986 | 0.669032138672   | 0.942487793455  |
| B | 0.437769705492  | 1.2410000076     | -0.44173669576  |
| B | 1.12114288743   | -0.0465592897344 | 0.122103830058  |
| B | -1.69908650282  | -0.128032489361  | 0.495629043798  |
| B | -0.46250616794  | -3.28091275995   | -2.76572695276  |
| B | -0.633780928037 | -2.1965399235    | -1.37154366535  |
| B | -1.71196574261  | -3.76287564639   | -1.93967672036  |
| B | -1.31480882547  | -1.75738060004   | 0.252519733094  |
| B | 0.492170893235  | -0.889707968037  | -1.61444295725  |
| B | -0.474803560387 | -0.392589226568  | -0.45203508723  |
| B | -3.08029739569  | -3.66868718787   | -1.02920758082  |
| B | -1.54475958335  | -3.22524377645   | -0.360680647492 |
| B | -4.35445123131  | -3.08559408269   | -0.204149551946 |
| B | -2.89747267748  | -2.51032265241   | 0.248223798801  |
| B | -3.07688500966  | -0.800567192157  | 0.849344464022  |
| B | -4.30148206185  | -1.80303118859   | 0.656293271337  |
| B | 0.451644266466  | -2.02918084556   | -2.63499977434  |

structure matching polymerization for boron cluster 17\_5-12

|   |                 |                 |                    |
|---|-----------------|-----------------|--------------------|
| B | -0.304614910428 | 1.00797236591   | 1.06003750162      |
| B | -0.198690812375 | -0.203032956018 | -0.000389803086436 |
| B | 1.13221532551   | 0.0690677879817 | -1.08422535629     |
| B | 0.211559837228  | -1.20851540988  | -1.19303926194     |
| B | 0.877726368247  | 1.16058516881   | 0.0254042132773    |
| B | -3.16065921113  | -0.490932334618 | 2.46372766485      |
| B | -2.38886358909  | -3.93938372329  | 0.893764134069     |
| B | -4.55046207374  | -1.08782441849  | 3.38057633347      |
| B | -3.1888817853   | 1.25770629004   | 2.97649260665      |
| B | -1.02728330064  | -1.59385301475  | 0.489680407251     |
| B | -2.41708616326  | -2.19074509863  | 1.40652907587      |
| B | -4.03576226773  | -2.32038622779  | 2.63308217996      |
| B | -1.54198310666  | -0.36129120545  | 1.23717456076      |
| B | -3.48496642006  | -3.52466308839  | 1.86536289164      |
| B | -1.29236809343  | -3.07819858653  | 0.279934283514     |
| B | -2.09277895433  | 0.842985655143  | 2.00489384908      |
| B | -4.28537728095  | 0.396521153282  | 3.59032245721      |

structure matching polymerization for boron cluster 17\_6-11

|   |                 |                 |                 |
|---|-----------------|-----------------|-----------------|
| B | -1.8438009578   | 0.372811599237  | 0.109743319777  |
| B | -0.906992443976 | 1.15733626336   | -0.864717783761 |
| B | -1.44730042348  | -0.91087126208  | 0.871934629061  |
| B | -0.230060349315 | -0.254281214685 | -0.134008603723 |
| B | 0.5670892419    | 0.819975456425  | -1.25968042578  |

|   |                 |                 |                 |
|---|-----------------|-----------------|-----------------|
| B | 1.36729092108   | -0.390258231841 | -0.729342254255 |
| B | 3.15058112191   | -1.7772414762   | 2.3247309247    |
| B | 4.16622702141   | -1.00840500062  | 1.22769525359   |
| B | -0.266525219445 | -0.941693746056 | 2.12517463365   |
| B | 3.08927969099   | -0.125988182303 | 2.29367165114   |
| B | 0.426901093368  | 0.366732492358  | 1.66715144155   |
| B | 1.88336947592   | -2.60451334956  | 2.64422088372   |
| B | 0.376329370141  | -2.25326866544  | 2.55655613956   |
| B | 4.88797055591   | 0.199516211027  | 0.602099996031  |
| B | 1.50548608528   | -0.969769368406 | 2.08602411945   |
| B | 1.92064789682   | 0.731548626476  | 1.49928698997   |
| B | 3.39578318489   | 0.563966342091  | 0.710967073196  |

structure matching polymerization for boron cluster 18\_1-17

|   |                  |                 |                 |
|---|------------------|-----------------|-----------------|
| B | 0.793348935758   | 0.381218556412  | -0.26193742494  |
| B | 0.154836087115   | -3.18817821556  | -1.47990298093  |
| B | -0.807097768777  | -0.801304993852 | 0.639425310886  |
| B | -0.498373770278  | -0.31117721833  | -0.999093597914 |
| B | -0.138748940847  | -3.5327883009   | -0.011382343458 |
| B | -0.0995119731296 | -0.293746659344 | -2.64776279949  |
| B | -0.607976786777  | -2.50982278283  | 1.12905166306   |
| B | -1.08308608972   | -1.46412454615  | 2.27792941949   |
| B | -0.968219111574  | 2.0933921411    | -0.912355068152 |
| B | -0.48998008041   | 1.04364395275   | -2.06854916484  |
| B | -1.55194306172   | -0.423287692529 | 3.403033583     |
| B | -1.63153643182   | 1.96044504992   | 1.90677606344   |
| B | -1.30214975347   | 0.194702960227  | 1.9078046356    |
| B | -1.78630902433   | 1.0832786475    | 3.20872485921   |
| B | 0.0757148347503  | -1.79832125337  | -2.2186502432   |
| B | -0.317475400326  | -1.97093994136  | -0.473026571589 |
| B | -1.04623998514   | 0.892012638562  | 0.325579273243  |
| B | -1.38883465144   | 2.54550075518   | 0.46533418562   |

structure matching polymerization for boron cluster 18\_2-16

|   |                |                 |                 |
|---|----------------|-----------------|-----------------|
| B | 0.529730708029 | -0.833377936698 | -0.480828224259 |
| B | 0.484792793599 | 0.615459822154  | 0.252735956364  |
| B | -2.01220949676 | -1.52452708371  | 1.20334291015   |
| B | -6.04780758412 | -0.593859198206 | 2.05100111597   |
| B | -5.03953564817 | -1.76290774015  | 2.20524768286   |
| B | -1.07105415826 | 1.166249885     | -0.396434657636 |
| B | -3.96235693472 | 1.18933224401   | 1.27869099297   |
| B | -4.49664013981 | -0.300728457561 | 1.79616534808   |
| B | -2.85107593473 | -0.142221122059 | 1.42887403974   |
| B | -5.67955781998 | 0.896183852044  | 1.46822180749   |

|   |                |                 |                 |
|---|----------------|-----------------|-----------------|
| B | -3.55474622508 | 2.38813462082   | 0.197081793221  |
| B | -1.98304315635 | 2.43449085164   | -0.679529327428 |
| B | -3.19890927736 | 3.49343140174   | -0.921842270403 |
| B | -2.36114106938 | 1.25618138358   | 0.600260591622  |
| B | -4.6377533946  | 3.43259016841   | -0.344939318415 |
| B | -1.45421681009 | -0.178648206117 | 0.455163906906  |
| B | -3.4550260577  | -1.76862281014  | 1.81981518779   |
| B | -5.20211168139 | 2.25997745718   | 0.655634250304  |

structure matching polymerization for boron cluster 19\_1-18

|   |                  |                 |                 |
|---|------------------|-----------------|-----------------|
| B | -0.0326601575283 | -0.681777000144 | -0.02275145736  |
| B | -1.73840607082   | 1.51206099142   | 2.78772116171   |
| B | 0.741860964092   | 4.07712096044   | -0.512834299945 |
| B | -0.566327206979  | 0.889742461753  | 0.363124596335  |
| B | 0.0765867084914  | 2.61270224005   | 0.0117437028328 |
| B | 0.21782297739    | 1.03322360832   | -0.983886284835 |
| B | 1.70296632913    | 4.88715639623   | -1.88578464694  |
| B | -1.35190169037   | 0.589246713328  | 1.64537702088   |
| B | 1.8542576065     | 3.60710672023   | -2.75261635364  |
| B | 0.925525059499   | 2.56666445624   | -1.54940990423  |
| B | -0.834862608085  | 2.24165781166   | 1.49252006533   |
| B | -0.225147323524  | 5.43091729686   | 1.8983577336    |
| B | 0.956156790914   | 1.01378118975   | -2.32801278124  |
| B | 1.27582244552    | 5.71429215709   | -0.719974402795 |
| B | -0.933969126905  | 4.39087641309   | 2.69970701885   |
| B | 0.559746944664   | 5.80156742247   | 0.633885863343  |
| B | -0.169040165185  | 3.90709681559   | 1.07268429679   |
| B | 1.65497440377    | 2.13999691072   | -3.06928683207  |
| B | -1.49222848115   | 2.98334061665   | 3.0453791102    |

structure matching polymerization for boron cluster 19\_2-17

|   |                 |                 |                 |
|---|-----------------|-----------------|-----------------|
| B | -0.324357236587 | 0.609817212896  | -0.269283910747 |
| B | -0.66549578993  | -0.905486579178 | -0.745462007548 |
| B | 1.40806741233   | -2.42482471683  | 3.43041419594   |
| B | 2.09258582046   | 0.527950168319  | 2.04239836222   |
| B | 2.77390814924   | 0.227765033023  | 3.61273868423   |
| B | 0.845902411305  | -2.07532102477  | 2.04357648983   |
| B | 3.21317269996   | -0.478199047558 | 5.09130760899   |
| B | 1.0789763777    | -0.708383481856 | 1.24084289409   |
| B | 1.32129656799   | 0.681598195039  | 0.435631360122  |
| B | 3.99830761967   | 2.30691237087   | 4.0465869364    |
| B | 3.75531924776   | 0.910371426898  | 4.85781974023   |
| B | 1.56766613731   | 2.05700039856   | -0.349606443761 |
| B | 3.19413043354   | 3.42644469135   | 1.49607491521   |

|   |               |                 |                |
|---|---------------|-----------------|----------------|
| B | 2.2780069679  | 1.92798445723   | 1.1196755374   |
| B | 2.40020597438 | 3.25088665407   | 0.144294811641 |
| B | 2.3216054925  | -1.56793994797  | 4.38692176749  |
| B | 1.77626607256 | -0.951280701328 | 2.78881849614  |
| B | 3.05242925753 | 1.82822970138   | 2.68348076834  |
| B | 3.87345074954 | 3.29296941135   | 2.91016730169  |

structure matching polymerization for boron cluster 19\_3-16

|   |                 |                 |                 |
|---|-----------------|-----------------|-----------------|
| B | -0.558911433858 | -1.00262686201  | 0.131960638926  |
| B | 0.661572232006  | -0.03340199857  | 0.237876043365  |
| B | 0.625609421642  | -1.11730068086  | -0.887554679197 |
| B | 0.482987839326  | 2.08697061625   | -0.725965902102 |
| B | -2.05748601015  | 4.54543903284   | 2.02043779108   |
| B | 0.246320754098  | 5.35995831421   | 0.462639980698  |
| B | -1.77520980584  | 1.40961978032   | 0.946539831438  |
| B | -3.17929493817  | 3.4075555397    | 2.3788131929    |
| B | -1.75445335643  | 2.88677800866   | 1.77483777855   |
| B | -1.95356092347  | 0.0499013597424 | 0.123736720694  |
| B | 1.26186540182   | 4.81006135144   | -0.68831976562  |
| B | -3.23256390394  | 1.90000865989   | 1.88395436587   |
| B | -3.08849979806  | 0.484446805275  | 1.08798901645   |
| B | -0.459274927824 | 2.40315427476   | 0.71747594049   |
| B | 1.37983969737   | 3.36362756868   | -1.23660433575  |
| B | -0.953295403823 | 5.62176896191   | 1.469156971     |
| B | 0.449652345156  | 3.62144797712   | 0.038465004121  |
| B | -0.599377718583 | 4.0369408473    | 1.30112692178   |
| B | -0.647150904805 | 0.964398694402  | -0.265748618336 |

structure matching polymerization for boron cluster 20\_1-19

|   |                 |                 |                 |
|---|-----------------|-----------------|-----------------|
| B | -0.355734214328 | -0.282883275529 | -0.793852319384 |
| B | -1.39824014208  | 1.6183119367    | 1.06323113281   |
| B | 3.60507454438   | 0.114280724436  | 1.11441983772   |
| B | -1.60198127129  | 1.63163082463   | 2.68098655343   |
| B | 0.845239903435  | -0.193662633779 | 3.01228947502   |
| B | -0.171585106954 | 1.35847238688   | 5.1447696822    |
| B | 1.09554383015   | 0.508071088145  | 4.57982865748   |
| B | 3.22734221769   | 0.394196248084  | -0.440466167015 |
| B | 3.69319135334   | 0.0955624916597 | 2.70175368608   |
| B | -0.91588635438  | 1.78401476436   | -0.470509130904 |
| B | 2.46541451462   | 0.136591518818  | 3.73345606621   |
| B | 1.9144544238    | 0.802213180726  | -1.14810752009  |
| B | -1.40283016468  | 1.86085877188   | 4.2761951788    |
| B | 1.86755551218   | -0.177179877072 | 0.326431713513  |
| B | 0.688218930602  | -0.540012014795 | 1.39136957957   |

|   |                  |                 |                |
|---|------------------|-----------------|----------------|
| B | -0.0312655779164 | 0.682192430353  | 0.390913809072 |
| B | -0.527079246273  | 0.432978355324  | 1.98764743802  |
| B | 2.22286724175    | -0.211252265032 | 2.06096671915  |
| B | -0.338459246703  | 0.809194746016  | 3.61886029185  |
| B | 0.387974384262   | 1.31912506777   | -1.15424262318 |

structure matching polymerization for boron cluster 20\_2-18

|   |                  |                  |                 |
|---|------------------|------------------|-----------------|
| B | -0.398443268193  | -0.0194973214867 | -0.290007631443 |
| B | -0.0931130580348 | 0.383664669568   | 1.25385134737   |
| B | -2.07462236191   | -0.0237990409627 | -2.82607828479  |
| B | 3.4050302241     | -0.122026902614  | -1.11483346091  |
| B | -1.87929458041   | -1.39193215064   | -3.56374611178  |
| B | 1.97216990508    | -1.03591248938   | -1.53976563824  |
| B | 0.917608870795   | -3.04699345673   | -3.54502705846  |
| B | 2.4502183558     | -3.56277693496   | -3.53501113454  |
| B | 3.05464244857    | 1.34021900323    | -0.520227456844 |
| B | 3.65618758888    | -2.89500251506   | -2.79054166421  |
| B | 0.278404960124   | 1.4425442349     | -1.131580195    |
| B | 3.60889084545    | -1.55727874318   | -1.88337503096  |
| B | 1.65353213702    | 2.04092117033    | -0.526728282434 |
| B | -0.548950636692  | -2.31118799574   | -3.55538910572  |
| B | 0.627386817071   | -1.78012074077   | -2.3711378012   |
| B | 2.20061960134    | -2.17664777646   | -2.72537414057  |
| B | 1.80702570702    | 0.58938160932    | -1.24023871912  |
| B | -0.984554702949  | 0.742925583278   | -1.91028625288  |
| B | 0.409212417337   | -0.254835704096  | -1.54687645445  |
| B | -0.628363517869  | -0.758932739868  | -2.7430086141   |

structure matching polymerization for boron cluster 20\_4-16

|   |                 |                 |                 |
|---|-----------------|-----------------|-----------------|
| B | 0.171519023153  | 0.390847483806  | -0.126711820426 |
| B | 0.606533307524  | -1.06570216755  | 0.293896254533  |
| B | 0.515701210165  | 0.219156488912  | -1.65633474507  |
| B | 0.950715494536  | -1.23739316244  | -1.23572667011  |
| B | -0.712364830807 | -0.101758320779 | 1.29936564921   |
| B | -1.99840343992  | 3.88281591111   | 3.03881174868   |
| B | 0.795782585128  | 1.99015388632   | 3.07910001642   |
| B | 0.77688536958   | 3.49326739499   | 3.49626364142   |
| B | -2.00968825808  | 2.26967741354   | 2.41320003573   |
| B | -3.36560233182  | 3.18229885255   | 2.71606245552   |
| B | -2.34897800016  | -0.493984865524 | 0.992395020144  |
| B | -0.505141436387 | 2.94542851213   | 2.65469405646   |
| B | -3.80205861827  | 0.161593309489  | 1.6622191369    |
| B | -3.83142889043  | -1.21323472825  | 0.871020102279  |
| B | -0.41888628074  | 1.18806873555   | 2.28322485018   |

|   |                 |                |                |
|---|-----------------|----------------|----------------|
| B | -2.54444462255  | -1.93366497576 | 0.252223407392 |
| B | -0.529076137393 | 4.34673736618  | 3.56610650953  |
| B | -1.07875665912  | -1.44478989267 | 0.53077464236  |
| B | -3.60594308469  | 1.68576626357  | 2.17728070243  |
| B | -2.14421328551  | 0.65192521465  | 2.13766670533  |

structure matching polymerization for boron cluster 21\_2-19

|   |                 |                 |                  |
|---|-----------------|-----------------|------------------|
| B | 0.916872429043  | 1.22541246373   | -0.0447919314526 |
| B | 0.546661114041  | 0.0673249331606 | 1.03272536702    |
| B | -4.89815352433  | -3.96590059527  | -3.35727241386   |
| B | -1.24551197401  | -1.45205512911  | -1.45934504203   |
| B | -5.29939765377  | -3.54900522902  | -0.34285533407   |
| B | -2.611543899    | -2.29111874548  | -1.76018017846   |
| B | -4.39993012931  | -2.8392564725   | 0.688134317214   |
| B | 0.0802066138078 | -0.588470322627 | -0.898689539213  |
| B | -5.31054420703  | -3.86751177958  | -1.83921850218   |
| B | -0.887655094992 | -0.908025905018 | 0.279036059396   |
| B | -2.56333829112  | -1.93987335931  | -0.14191518101   |
| B | -3.44969869624  | -3.03558223707  | -2.96689020143   |
| B | -1.23700642263  | -2.10055580539  | -4.75982049623   |
| B | -3.27988121956  | -2.05180580041  | 1.45515005547    |
| B | 0.157679910406  | -0.840347676188 | -2.39798797972   |
| B | -2.58665787236  | -2.88401872113  | -4.69640484267   |
| B | -0.307588991707 | -1.36996271648  | -3.80874596586   |
| B | -1.81014028475  | -2.11441122343  | -3.17731392674   |
| B | -1.9677311566   | -1.31444930619  | 1.33940260239    |
| B | -3.93332884123  | -3.65494376392  | -4.47718156749   |
| B | -3.93177662409  | -2.94009412213  | -1.07988357297   |

structure matching polymerization for boron cluster 22\_1-21

|   |                 |                 |                 |
|---|-----------------|-----------------|-----------------|
| B | 0.302812733489  | -0.330061783585 | -0.522823124678 |
| B | -0.273184061116 | -1.85848957583  | 1.03296661384   |
| B | 0.809318485872  | 0.818215622205  | 0.519393935307  |
| B | 0.988088653452  | -0.770539181722 | 0.968068215846  |
| B | -2.06181101473  | 0.520879579954  | 1.17029058531   |
| B | 2.27914969282   | 0.169700918758  | 1.25705183855   |
| B | -0.973003561295 | 3.15077449699   | 1.05889265589   |
| B | -1.5788495796   | -2.73541564653  | 1.08399992313   |
| B | 0.338792345313  | 4.04080438121   | 1.16912907892   |
| B | 2.05182507556   | 1.89039691407   | 0.876471248753  |
| B | -1.76162890379  | -1.1082166231   | 1.21512030073   |
| B | -4.8431678612   | 0.0511093873695 | 1.42459703447   |
| B | 3.4345341876    | 1.31790591339   | 1.53822016005   |
| B | -2.31697779365  | 2.14772314742   | 1.16818383233   |

|   |                 |                |                |
|---|-----------------|----------------|----------------|
| B | -4.61284844098  | -1.50295404535 | 1.40955674991  |
| B | -3.64524827239  | 1.1982561143   | 1.31419927276  |
| B | -3.34074310688  | -0.52153695581 | 1.28795537618  |
| B | 3.25704924428   | 2.8663120594   | 1.41991720558  |
| B | -3.12411046248  | -2.24222125551 | 1.26096326295  |
| B | 1.88860114829   | 3.66056202012  | 1.1942358006   |
| B | 0.499473804738  | 2.48307929913  | 0.55166602178  |
| B | -0.763626076108 | 1.40918694678  | 0.816444770401 |

structure matching polymerization for boron cluster 22\_6-16

|   |                  |                  |                 |
|---|------------------|------------------|-----------------|
| B | 0.629507860588   | -1.06170828308   | -1.94958117912  |
| B | -0.175240005972  | 0.146817960057   | -1.33142998385  |
| B | 1.76526847537    | -1.82010291906   | -1.21791728904  |
| B | 1.1041915611     | -0.499380647206  | -0.322804552202 |
| B | -0.0235382435072 | 0.843477571643   | 0.0649602975653 |
| B | 1.12029386688    | 0.493022041294   | 1.06002210088   |
| B | -1.52382827654   | 1.10344714725    | -1.4154543345   |
| B | 0.529277462077   | 2.8764789303     | 1.82674155595   |
| B | 0.436221624599   | 2.97555956611    | 0.281231144351  |
| B | -3.21000044128   | -1.24055136215   | 0.116810900932  |
| B | -1.74666772391   | 1.16275641661    | 1.91930349858   |
| B | -0.669768565744  | 2.12137986841    | 1.0857278112    |
| B | -1.81661698923   | 1.26273874712    | 0.182742123616  |
| B | -0.404187401993  | 1.90569387698    | 2.76572378719   |
| B | -2.35559559424   | -0.221777720481  | 2.6160273766    |
| B | -3.19815587023   | -1.50919455321   | 1.68141699072   |
| B | -2.85846144417   | -1.60582396275   | 3.27316807971   |
| B | -2.694525617     | 0.0469223240094  | 0.978501417028  |
| B | -1.99438796224   | -0.633469575778  | 4.11856445383   |
| B | -2.44900333193   | -0.0461094610193 | -0.704758665655 |
| B | -0.563093830224  | 2.15317172575    | -0.710892020563 |
| B | -1.25848041257   | 0.71589903665    | 3.54209872288   |

structure matching polymerization for boron cluster 23\_1-22

|   |                  |                |                 |
|---|------------------|----------------|-----------------|
| B | 0.278049009307   | -0.79440132622 | 0.39124515904   |
| B | -0.0902060215279 | 5.79003296359  | -2.0527596203   |
| B | -2.10296784268   | 3.73668374135  | -1.50531965482  |
| B | -1.64323903014   | 5.44982019118  | -2.04832307873  |
| B | 0.299719694995   | 1.75188900173  | -0.365301672161 |
| B | -3.22594376739   | 5.03201473175  | -2.02463731147  |
| B | -1.99250745508   | 0.39318058408  | -0.941006273266 |
| B | 1.12020492328    | 4.81161302172  | -1.68021959387  |
| B | -3.50637262511   | 0.674521656078 | -0.988402181325 |
| B | -3.71010587256   | 3.40603242334  | -1.64826499683  |

|   |                 |                |                 |
|---|-----------------|----------------|-----------------|
| B | 0.672307692902  | 3.31572115106  | -0.845337515305 |
| B | 2.76401927489   | 0.858968474942 | -1.51353598662  |
| B | -4.77527796325  | 4.59628169543  | -2.04101143317  |
| B | -0.360598181659 | 0.312952118092 | -0.889083643475 |
| B | 3.22627210587   | 2.33742922498  | -1.78050174736  |
| B | 1.24058108993   | 0.423084090431 | -1.06626403334  |
| B | 1.79828169893   | 2.09883742522  | -1.03748726119  |
| B | -5.33631171018  | 3.18142712797  | -1.72485333432  |
| B | 2.2745076232    | 3.63705359244  | -1.68824177556  |
| B | -4.516569931    | 1.85468932296  | -1.3279474822   |
| B | -2.60778704101  | 2.11870873343  | -1.17496624326  |
| B | -0.957590339235 | 2.65379166631  | -0.933584822371 |
| B | -0.505012918729 | 4.23361703756  | -1.58731038441  |

structure matching polymerization for boron cluster 23\_2-21

|   |                 |                 |                |
|---|-----------------|-----------------|----------------|
| B | 0.732429747279  | 0.587966763692  | -1.2435388924  |
| B | 0.255701507854  | 0.491251884204  | 0.306507265802 |
| B | -2.51639980228  | -3.87341468039  | 2.6692585763   |
| B | -0.763218973841 | -3.27117984921  | 2.8548838318   |
| B | -4.0697349271   | -4.58926436984  | 3.02861095548  |
| B | -1.43661563783  | -1.67589015208  | 2.67469604482  |
| B | 0.262752050045  | -1.79898978829  | 2.70401416306  |
| B | -4.65223792048  | -1.55315502916  | 1.66210545613  |
| B | -2.66946889241  | -5.51817349407  | 3.36476867731  |
| B | -2.57757418697  | 0.750223781074  | 0.810081470372 |
| B | -1.96621422649  | -0.690043430763 | 1.39536616868  |
| B | -1.19939447758  | -4.95048900242  | 3.0912472668   |
| B | -5.76283658625  | -4.13985669057  | 2.57446186545  |
| B | -0.32407692102  | -0.498304412856 | 1.9071784944   |
| B | -3.64838404962  | -0.35781789343  | 1.19974523956  |
| B | -5.45949517048  | -5.54594115857  | 3.21550468396  |
| B | -5.65996676561  | -2.70120567621  | 1.96581103578  |
| B | -3.97464413716  | -3.07241392139  | 2.18436241443  |
| B | -1.03582560797  | 0.67803652657   | 1.1275217477   |
| B | -4.10565184276  | -6.17919601914  | 3.55210138695  |
| B | -3.0713095425   | -1.60309685868  | 2.31223915659  |
| B | 0.940753054945  | -3.15215174843  | 3.1425616894   |
| B | 0.321490202389  | -4.5452762552   | 3.17169040232  |

structure matching polymerization for boron cluster 24\_1-23

|   |                 |                 |                |
|---|-----------------|-----------------|----------------|
| B | -0.739260473711 | -0.249915993221 | 0.549303054077 |
| B | 1.10508900241   | -0.565163432817 | -1.61206772176 |
| B | 1.71349132761   | 0.95103881779   | 0.739282898212 |
| B | 1.55674163663   | -0.455979500624 | -3.30552959894 |



|   |                 |                   |                 |
|---|-----------------|-------------------|-----------------|
| B | 3.60289422334   | 0.847133024225    | -1.78857223909  |
| B | 3.15803990232   | 1.39506049203     | 0.400506578644  |
| B | 4.70137074816   | 2.04888754314     | -4.9527567701   |
| B | -0.459764622879 | -0.281752158163   | -1.26314872319  |
| B | 6.57217326743   | 2.89836941711     | -2.09487284278  |
| B | 4.87527999479   | 1.98472837947     | -1.87730806081  |
| B | 0.556817400985  | 0.256839709349    | -0.154916714983 |
| B | 1.81330302336   | 0.49025719235     | -4.75659470801  |
| B | 4.62421937595   | 1.89097782586     | -0.126410534793 |
| B | 5.5469269248    | 2.3591011638      | -3.43971347351  |
| B | 0.363149123485  | -0.00433518556374 | -4.34244124332  |
| B | 3.29022410746   | 1.22164998177     | -4.86263757232  |
| B | 3.04731468836   | 0.310622713872    | -3.44410744743  |
| B | 5.95453580845   | 2.50640594223     | -0.666684244937 |
| B | -0.171254850282 | -0.299280130833   | -2.8386041131   |
| B | 4.08537773473   | 1.59083997394     | -3.33409700481  |
| B | 6.10398669732   | 2.86342469559     | -4.8982751471   |
| B | 6.94054645699   | 3.2054485355      | -3.62640239178  |
| B | 2.70446014251   | -0.530819707622   | -2.07133358876  |
| B | 2.33293817034   | 0.339182501509    | -0.681841776669 |

structure matching polymerization for boron cluster 24\_2-22

|   |                |                  |                 |
|---|----------------|------------------|-----------------|
| B | 0.339381155943 | -0.35684569806   | 0.582737205978  |
| B | 1.09496390037  | 1.03618927026    | 0.225225013038  |
| B | -1.30446858572 | -0.635491752725  | -1.34709170079  |
| B | -1.7233153236  | -0.145263347964  | -2.89539070372  |
| B | -6.60547523564 | -3.20227626319   | -2.69274106512  |
| B | -3.64169842755 | -0.0449912648952 | -4.97675999192  |
| B | -7.27311485707 | -2.69362334709   | -4.24035210862  |
| B | -2.317738267   | -1.9078295365    | -0.675597281112 |
| B | -6.23143916127 | -3.84401735718   | -1.09232299417  |
| B | -1.18136956007 | -1.10549970991   | 0.194136849601  |
| B | -3.92191889506 | -2.16370985123   | -3.0487724153   |
| B | -6.34374267918 | -1.6786563201    | -5.06217853645  |
| B | -2.54796041983 | -1.55672159024   | -2.27265090828  |
| B | -5.10174713173 | -2.90751445361   | -2.103094485    |
| B | -2.34550593107 | 0.454497555783   | -4.28006701095  |
| B | -2.9622483878  | -0.984475705294  | -3.75091105298  |
| B | -3.40955457775 | -2.92727908401   | 0.311558788788  |
| B | -2.12276118873 | -2.15124899562   | 0.93616713344   |
| B | -3.62845855133 | -2.61589374239   | -1.43692834931  |
| B | -5.0711565947  | -0.803441671701  | -5.15139791777  |
| B | -4.78512799551 | -3.40629226042   | -0.429578621352 |
| B | -5.50701216842 | -2.24563831919   | -3.71273027401  |

|   |                |                |                |
|---|----------------|----------------|----------------|
| B | -8.08463632304 | -3.66873203684 | -3.25151946561 |
| B | -7.62987707169 | -4.16378731865 | -1.82541990747 |

structure matching polymerization for boron cluster 24\_3-21

|   |                 |                 |                 |
|---|-----------------|-----------------|-----------------|
| B | -0.723660442867 | -0.267765225308 | -0.436064272388 |
| B | 0.649246103588  | 0.477381075324  | -0.445002550404 |
| B | 0.612460451982  | -1.08247399496  | -0.354321989975 |
| B | 0.126557663281  | -0.756959519087 | 2.20645220428   |
| B | -0.17756901743  | 1.85763895355   | 0.913509372377  |
| B | 0.725358549333  | 0.527231810319  | 1.32841641288   |
| B | -2.00951263553  | 1.11187461009   | 3.11425422455   |
| B | 1.57927313513   | 1.77382310688   | 0.735760013597  |
| B | -2.085898088    | 3.79111486663   | 2.14983971077   |
| B | -0.58492155018  | -1.8568649162   | 3.07844510821   |
| B | -1.29090018952  | 4.94763366905   | 1.404483175     |
| B | 0.629010226687  | 3.23526280682   | 0.391511290328  |
| B | -1.20525219303  | -0.33685824837  | 3.13454430526   |
| B | -3.9172374491   | 0.118795691339  | 4.95699186409   |
| B | 2.25258702794   | 3.18308446673   | 0.194488836766  |
| B | -2.75548204668  | 2.57991510105   | 3.10324191263   |
| B | -3.22402626228  | -1.29110717379  | 4.96129997042   |
| B | -3.41165576427  | 1.43224680565   | 4.07247055263   |
| B | -2.61028914611  | -0.119501803775 | 4.04103588443   |
| B | 1.53429958113   | 4.56394622572   | 0.0518633361072 |
| B | -1.87837743419  | -1.69188318301  | 4.05933288514   |
| B | 0.0724833379539 | 4.94340952568   | 0.57485106374   |
| B | -0.961696684996 | 3.35829455867   | 0.958150524957  |
| B | -1.46369427458  | 2.14012168215   | 1.99874032988   |

structure matching polymerization for boron cluster 24\_4-20

|   |                 |                 |                 |
|---|-----------------|-----------------|-----------------|
| B | -1.10770172014  | 0.141702504505  | 0.574478952681  |
| B | -0.629068014528 | 1.58210511363   | 0.142097501331  |
| B | 0.213667838203  | -0.601511894511 | 0.136050870688  |
| B | 0.692301543816  | 0.838890714611  | -0.296330580661 |
| B | 1.25873031706   | -3.6525834475   | 0.513336479127  |
| B | 2.32429883944   | -2.90885096523  | 1.64387187497   |
| B | 0.498469317335  | -4.51139442193  | -0.701751965502 |
| B | 1.31787923552   | -1.99465730517  | 0.310633128467  |
| B | 2.5434961701    | -1.29440443647  | 1.41701573389   |
| B | 0.15674592233   | -1.64103453293  | -3.20225312158  |
| B | 1.33307474774   | -5.39960896901  | 0.576072545552  |
| B | 1.68939962914   | 0.369463256618  | -1.56001290301  |
| B | 1.93670412279   | -0.535220453503 | -0.0425161762   |
| B | 2.13620696785   | -4.48474201606  | 1.63674761152   |

|   |                  |                 |                 |
|---|------------------|-----------------|-----------------|
| B | -0.278230102039  | -3.70441774052  | -1.97528845447  |
| B | 2.97554783906    | 0.206703091293  | 0.992514207323  |
| B | 0.82592852347    | -0.354366616217 | -2.66527880762  |
| B | -0.0655279371009 | -5.50111421918  | -1.98533392911  |
| B | -0.393090621692  | -3.11674557373  | -3.55306522273  |
| B | 0.367634516208   | -2.84128804786  | -0.699266283951 |
| B | 2.60962350635    | 0.930961937628  | -0.350690058027 |
| B | 0.562603331927   | -6.16205026227  | -0.653618037522 |
| B | 0.943853050093   | -1.33455428817  | -1.29581852383  |
| B | -0.473919439101  | -4.639283143    | -3.31671479703  |

structure matching polymerization for boron cluster 25\_1-24

|   |                 |                 |                 |
|---|-----------------|-----------------|-----------------|
| B | -0.259825705383 | -0.358260729652 | -0.607826677954 |
| B | 1.43817356602   | -0.560495635475 | 1.62026277958   |
| B | 0.516481952398  | -2.015686882    | 1.34988767603   |
| B | 2.29912754277   | 0.750423776341  | 2.1033320642    |
| B | -0.130016706092 | -0.312421457008 | 1.0680698818    |
| B | -1.01445313369  | -1.83502159541  | 0.786970429349  |
| B | -0.663673135844 | 3.1870014765    | 1.56641932238   |
| B | 2.90627138439   | -0.867459396138 | 2.46643055874   |
| B | -2.70174376179  | 1.23013065406   | 0.599074816009  |
| B | -1.70786312102  | -0.229502060912 | 0.646744957947  |
| B | 1.97209830408   | -2.07387781225  | 2.01465444594   |
| B | 1.66037472707   | 2.29108582822   | 1.910584914     |
| B | -2.55777110202  | -1.60628606519  | 0.374091589764  |
| B | -1.96526777708  | 2.58032011487   | 1.02079868099   |
| B | 3.14029735849   | 2.01076595009   | 2.7677213001    |
| B | 0.734898706926  | 3.82243224379   | 2.20239342193   |
| B | 0.797152029248  | 1.01570918643   | 1.36356440981   |
| B | -3.30448551279  | -0.236594541153 | 0.294720281813  |
| B | 3.74175008053   | 0.444468721848  | 3.10978314269   |
| B | -0.870965271733 | 1.28810470999   | 1.07056227596   |
| B | 3.01222204886   | 4.62042267484   | 3.76655282618   |
| B | 3.87460556417   | 3.2409322021    | 3.85470622406   |
| B | 4.37830790456   | 1.72980973026   | 3.82292234203   |
| B | 2.31896663607   | 3.49658214345   | 2.76564192813   |
| B | 1.63126049528   | 4.92466192434   | 3.0851394386    |

structure matching polymerization for boron cluster 25\_2-23

|   |                 |                  |                 |
|---|-----------------|------------------|-----------------|
| B | 0.465940639918  | -0.0815689935243 | -0.846967208085 |
| B | -1.04326512532  | -0.458713446096  | -0.37864392786  |
| B | 0.874013301069  | 3.20670423293    | 5.32538775689   |
| B | 2.34233575659   | -0.57925311911   | 1.41224774682   |
| B | -0.398298584669 | 4.19851687037    | 5.73453776847   |

|   |                  |                 |                 |
|---|------------------|-----------------|-----------------|
| B | 2.56762652171    | 1.39178849309   | 3.79746737889   |
| B | 3.82388733084    | 3.4886010473    | 5.14575706778   |
| B | 4.03855899397    | 2.26203948987   | 4.1341230256    |
| B | 0.761700053887   | -0.717256043376 | 0.714760034038  |
| B | 3.98106479517    | 0.0165099025969 | 1.73493238497   |
| B | -1.13388102167   | 2.1193236616    | 3.42217695965   |
| B | 4.06361083245    | 1.00611620159   | 3.05400219801   |
| B | -1.35298129573   | 1.2668490078    | 2.13010025254   |
| B | 1.02197717483    | 4.69711566067   | 6.09064394958   |
| B | 0.968774492428   | -0.379831496688 | 2.41076041804   |
| B | 1.28149701668    | 0.301009347274  | 3.92783866677   |
| B | -0.0190073189236 | 0.886160605314  | 3.03581372064   |
| B | 0.843405875579   | 1.86151053521   | 4.3047851221    |
| B | 2.6623304428     | 0.0458794412751 | 2.92151235297   |
| B | 2.40244704149    | 2.83275505698   | 4.57415949649   |
| B | -0.778062370688  | 3.02775394914   | 4.721928945     |
| B | 2.12650590813    | -1.07979867597  | -0.121363783687 |
| B | 3.58628153185    | -0.740918834054 | 0.355653323444  |
| B | -0.378900319748  | 0.211875886088  | 1.41373242461   |
| B | 2.48701097764    | 4.15326480915   | 5.69975999913   |

structure matching polymerization for boron cluster 26\_1-25

|   |                  |                  |                  |
|---|------------------|------------------|------------------|
| B | 0.968334895116   | -0.264537801406  | 2.31121353122    |
| B | 0.726882934575   | 1.27931792286    | 1.83953542139    |
| B | -0.656281711596  | -1.65465145798   | -3.26102496148   |
| B | -0.174584421838  | 3.20665661607    | -0.0629375504284 |
| B | -1.02392851589   | -0.0478101072119 | -3.61092465948   |
| B | 1.07295730432    | -1.52499684656   | 1.02657023998    |
| B | -0.251856337192  | -3.07546075533   | -2.65004390589   |
| B | 1.30529058216    | -1.75905924927   | 2.69286349938    |
| B | -0.743044553309  | 0.449717366608   | -0.671091670569  |
| B | -1.31906857258   | 1.51099870456    | -3.80272426309   |
| B | 0.344201102722   | 0.0470614913791  | 0.714438471101   |
| B | 0.512985787393   | -1.74767454312   | -2.01953328917   |
| B | 0.484571688072   | 2.87496390776    | 1.55034848781    |
| B | -0.0487525441329 | 1.59841681624    | 0.394140845704   |
| B | 1.1688261602     | -3.25381720161   | 0.287351441229   |
| B | 1.41690035001    | -3.04053995983   | 1.83369547185    |
| B | 1.25451373093    | -1.85941462848   | -0.620477297667  |
| B | -0.926994125995  | 3.77993137193    | -1.52673971776   |
| B | 0.589706931235   | -3.27154300711   | -1.26303300139   |
| B | -0.713471609313  | 1.04053450792    | -2.33216383746   |
| B | -1.16945154894   | 2.68660716845    | -2.73761666842   |
| B | -0.926957120147  | 2.09888423441    | -1.05838011206   |

|   |                 |                 |                 |
|---|-----------------|-----------------|-----------------|
| B | -0.487953115984 | 4.78729868234   | -0.335890805555 |
| B | 0.160343279993  | 4.36237802781   | 1.04908500521   |
| B | -0.759598112208 | -0.574889711381 | -1.95616887683  |
| B | -0.171400324625 | -1.63138165573  | 3.03085838203   |

structure matching polymerization for boron cluster 26\_2-24

|   |                  |                 |                  |
|---|------------------|-----------------|------------------|
| B | -0.0786581342709 | 0.268524348437  | -1.78313860087   |
| B | 0.858283466386   | 1.62556279586   | -1.51444064628   |
| B | -0.889343560669  | -1.15590076801  | -2.20985503221   |
| B | 0.461885746592   | 0.569988376777  | -0.221727930386  |
| B | 1.43889247215    | 2.12840089612   | -0.0369009867224 |
| B | -0.359822531854  | -2.06429655642  | 2.07936209349    |
| B | -0.519451310661  | 0.0203957213374 | -3.51967422078   |
| B | 1.38306501388    | 0.736436532198  | 2.92214865351    |
| B | 0.95135642697    | 0.532646312954  | 1.33143084938    |
| B | 0.331315577827   | 1.28894836893   | -3.01165019401   |
| B | -1.27302136584   | -2.43728147647  | -1.09671642116   |
| B | 2.18717953531    | 3.22408478219   | 0.890900516072   |
| B | 0.537083488208   | -0.661378814909 | 2.45165107891    |
| B | -1.64716344216   | -2.50058818537  | -2.68698534873   |
| B | -0.807168464802  | -2.20891890623  | 0.485988245449   |
| B | -0.479602841686  | -0.956845682555 | -0.62794216765   |
| B | 2.51204181697    | 3.21530311598   | 2.42046075304    |
| B | -1.31696656573   | -1.38468454401  | -3.75714175149   |
| B | 0.164017637057   | -0.818960537667 | 0.858664154841   |
| B | 0.118138931436   | -1.77539914759  | 3.58648828753    |
| B | 0.961682230991   | -0.492140326354 | 4.14140244689    |
| B | 1.76141988043    | 0.877755483421  | 4.51281838896    |
| B | 2.21760254797    | 2.10485007432   | 3.577808314      |
| B | 1.79469569076    | 1.90422633211   | 1.74122393239    |
| B | -2.79071279671   | -0.949250915212 | -3.69833890025   |
| B | -3.05614337434   | -0.208341900238 | -2.27711860954   |

structure matching polymerization for boron cluster 27\_1-26

|   |                |                |                |
|---|----------------|----------------|----------------|
| B | -0.77450856632 | 0.502861454669 | 0.50332646742  |
| B | 5.03674673561  | -1.13463758277 | -3.07533807766 |
| B | 4.27176533352  | 1.36929475521  | -2.01958775478 |
| B | 6.2057214929   | -2.1055463661  | -3.7303961438  |
| B | 3.78898549221  | -1.88380151816 | -2.28213790112 |
| B | 3.007086775    | 0.764627432933 | -1.22249910779 |
| B | 3.21679815079  | -5.24497148218 | -2.80149877155 |
| B | 6.41635510481  | -0.3537253927  | -3.76256135969 |
| B | 1.04943873147  | -3.24504267083 | -1.18319531533 |
| B | 2.59076888434  | -2.66997992213 | -1.39832142681 |

|   |                 |                 |                 |
|---|-----------------|-----------------|-----------------|
| B | 5.40212902063   | 0.593910565107  | -2.85771731272  |
| B | 5.99474945306   | -3.86643568947  | -4.07384006321  |
| B | 1.56089006253   | 0.042870534999  | -0.651092646221 |
| B | 2.31357059104   | -4.31173945467  | -1.67551281792  |
| B | 7.13542053421   | -2.94967738345  | -4.76861319238  |
| B | 4.66676380438   | -4.5539486616   | -3.35363026401  |
| B | 4.87512518899   | -2.88332856708  | -3.11215585467  |
| B | 0.178122109284  | -0.687226252727 | -0.252281794535 |
| B | 7.32596518913   | -1.37818098497  | -4.66010736722  |
| B | 3.73728196957   | -3.66917486506  | -2.23708166715  |
| B | 1.75362801599   | -5.71891325374  | -2.3315395662   |
| B | 0.628630862334  | -4.91089238517  | -1.48974648583  |
| B | -0.384734084675 | -3.86899044106  | -0.757463168177 |
| B | -0.179765233029 | -2.28275975941  | -0.421526249766 |
| B | 1.44221745079   | -1.65375206595  | -0.636170400438 |
| B | 4.20347805653   | -0.268959200403 | -1.88550260978  |
| B | 2.83045647556   | -0.957509504864 | -1.24244873008  |

structure matching polymerization for boron cluster 27\_2-25

|   |                 |                 |                |
|---|-----------------|-----------------|----------------|
| B | 0.586722145491  | 0.676012026793  | 0.151390524316 |
| B | 0.360169203097  | -0.55016271735  | 1.19275306246  |
| B | -2.02921640209  | 0.716195262289  | -2.6063777776  |
| B | -1.32102922554  | -0.153460925328 | -3.97029038024 |
| B | -7.11105424169  | -0.162424309684 | -5.30873704183 |
| B | -1.72884586008  | -2.57715286304  | -5.74522817677 |
| B | -6.45264516127  | -1.31828979904  | -6.15577145388 |
| B | -3.76147020365  | 1.16505964434   | -2.92511544059 |
| B | -6.33493022297  | 0.803435708762  | -4.26114947764 |
| B | -3.09377022742  | 1.77288738923   | -1.44428927317 |
| B | -3.86580535466  | -0.653736471604 | -5.23357595456 |
| B | -4.884394428    | -1.72371695154  | -6.20686190417 |
| B | -2.88458275706  | 0.319564004689  | -4.10023673416 |
| B | -5.49539593019  | -0.362495623332 | -5.23761410409 |
| B | 0.11580137992   | -0.802367927432 | -3.49604079658 |
| B | -0.815854609509 | -1.63778795779  | -4.62075814783 |
| B | -5.4655913236   | 1.5245749994    | -3.06271832642 |
| B | -4.61028986135  | 2.07669018481   | -1.82474800188 |
| B | -4.54695068038  | 0.661516190931  | -4.31851292213 |
| B | -3.27354678708  | -2.01080591038  | -6.04554809566 |
| B | -2.31540002831  | -1.0875592663   | -4.99353025695 |
| B | 0.644082186145  | -2.4182304215   | -4.10563092914 |
| B | -0.284036299252 | -3.06449744065  | -5.2680057336  |
| B | -0.306337280823 | 0.545671931356  | -1.43481092321 |
| B | -1.57292934679  | 1.37278468041   | -1.14252028373 |

|   |                |                 |                |
|---|----------------|-----------------|----------------|
| B | 1.32091659265  | -1.6957158776   | -2.81951979005 |
| B | 0.814579925695 | -0.495163828749 | -1.98741791487 |

structure matching polymerization for boron cluster 28\_1-27

|   |                 |                  |                  |
|---|-----------------|------------------|------------------|
| B | 0.735390250609  | -0.0318416789437 | 0.378301954664   |
| B | -2.59429680943  | 1.65119985716    | 1.45816242487    |
| B | -2.09011799252  | 2.66540722252    | 0.267018163718   |
| B | 0.48235365129   | -2.67225688604   | -1.05643170066   |
| B | -0.302500173451 | 3.0997215424     | -1.9407943944    |
| B | 1.13690230378   | -1.59107345925   | -2.14771525601   |
| B | -2.42082939786  | -0.0514200371428 | 1.17379857972    |
| B | 0.0842557266771 | -3.6733390831    | 0.170451573698   |
| B | -2.55187657563  | -0.963172602997  | 2.65106102638    |
| B | -0.995442734852 | 0.385453618216   | -1.37961755052   |
| B | 1.77540649142   | -0.481453062931  | -3.09239601767   |
| B | -1.94976398453  | 0.971204503311   | -0.0502902714729 |
| B | -0.69058987745  | -2.1195062566    | 0.0197868558033  |
| B | -1.30947044767  | 3.79067595091    | -0.653373469219  |
| B | -1.20252434585  | 2.03651610218    | -1.02819672503   |
| B | -1.32581028407  | -3.99382041345   | 2.64032465516    |
| B | -2.09904769546  | -2.54959550004   | 2.61680787445    |
| B | -1.86605743033  | -1.59625342157   | 1.18806302179    |
| B | 0.87846232771   | 2.64130381865    | -3.13945631188   |
| B | -1.16475330663  | -3.10230662078   | 1.27757712559    |
| B | 0.483889866699  | -0.0335322286169 | -2.1697239841    |
| B | 1.36309756323   | 1.06936572518    | -3.1970941681    |
| B | -0.173945599587 | 1.48963805118    | -2.34697126564   |
| B | 0.555491266981  | 4.20192476921    | -2.79183797416   |
| B | -0.416888599048 | 4.70435115849    | -1.63504658179   |
| B | -0.3278909043   | -1.16030944183   | -1.22504774371   |
| B | -2.81472731629  | 0.626032683118   | 2.65303851032    |
| B | -0.318862489285 | -4.48503065669   | 1.52375082691    |

structure matching polymerization for boron cluster 28\_2-26

|   |                  |                |                 |
|---|------------------|----------------|-----------------|
| B | -0.0816183610797 | -1.35086002538 | 0.441105799175  |
| B | -0.36871905123   | 0.247975901168 | 0.417366624673  |
| B | 2.98549864645    | 3.46805549112  | -5.92144659468  |
| B | 2.54742023374    | 5.17974525907  | -3.6914252023   |
| B | 2.78329422131    | 4.98223981268  | -5.47124937556  |
| B | 2.26531030006    | 2.74274539636  | -1.46312636748  |
| B | 2.46443444326    | 6.49381889763  | -4.91898359822  |
| B | -0.0788594492729 | 4.2460080674   | -0.265783766836 |
| B | 2.60707900098    | 2.15611294413  | -5.12121352731  |
| B | 0.610863155741   | 5.65357063413  | -0.876167837739 |

|   |                 |                 |                 |
|---|-----------------|-----------------|-----------------|
| B | 1.79880375412   | 6.64309222036   | -3.31500483922  |
| B | 2.10084298184   | 2.23062130177   | -3.32819984265  |
| B | 0.28915336384   | 0.135318757646  | -1.41908104589  |
| B | 1.79872218917   | 7.86979248505   | -4.38951801632  |
| B | -0.742111469177 | 2.832204282     | 0.0628750324585 |
| B | 1.24798506093   | 0.692323445711  | -2.86357359464  |
| B | -0.26862360218  | 1.42006509289   | -0.549149631787 |
| B | 1.3841392388    | 1.36999178963   | -1.26108491758  |
| B | 0.980050594499  | 8.03128430724   | -3.05600793485  |
| B | 1.96523614901   | 0.834025434212  | -4.41750307482  |
| B | 0.774599047429  | 6.92212484451   | -1.88775133317  |
| B | 1.55031344888   | 5.39494145023   | -2.25330425264  |
| B | 2.25651151163   | 3.87114886619   | -2.70068807803  |
| B | 2.39651221411   | 3.64418778112   | -4.37468741641  |
| B | 1.54016800723   | 4.20140667923   | -1.07325031238  |
| B | 0.674101284128  | 2.81490544857   | -0.751770995794 |
| B | 1.28119461741   | -0.534498711711 | -3.99097097993  |
| B | 0.537561172374  | -0.844337922576 | -2.66465402187  |

structure matching polymerization for boron cluster 28\_3-25

|   |                  |                 |                 |
|---|------------------|-----------------|-----------------|
| B | -0.606363099916  | 0.159390453176  | -1.4191588093   |
| B | 0.56798385478    | -0.205280893666 | -0.455769310582 |
| B | -0.832812319773  | 0.163064877067  | 0.131440582922  |
| B | 1.99900500281    | 0.896616498354  | 1.31412977471   |
| B | 1.29587381082    | -0.615887215616 | 1.09324017801   |
| B | -0.112902987464  | 1.06602615516   | 6.58525998532   |
| B | 0.0685535745052  | -3.06105151449  | 2.3056369516    |
| B | -0.631379044523  | -0.424401176398 | 6.44137226468   |
| B | 1.60800702921    | 1.8112359746    | 2.66994021156   |
| B | 0.672371193234   | 1.92570437482   | 5.44120334142   |
| B | 2.79324495483    | 2.45868630864   | 1.58734201043   |
| B | 0.262259144983   | -0.575764656135 | 3.76782143042   |
| B | -0.51290945265   | -1.37757289     | 5.11908499543   |
| B | 0.934998582917   | 0.273644275135  | 2.46236652694   |
| B | -0.0128987631565 | 0.323117613608  | 5.14635385714   |
| B | 2.78437293405    | -0.75586387132  | -1.43641095528  |
| B | 0.967197316788   | -2.2475836872   | 1.00213399192   |
| B | 1.58521275932    | 2.61247536724   | 4.24771320914   |
| B | 2.53558095193    | 3.13213254909   | 3.02604048871   |
| B | 0.80869864322    | 1.06363826649   | 3.92484702907   |
| B | -0.238216549522  | -2.20099604477  | 3.70205702364   |
| B | 0.420224627354   | -1.41937031658  | 2.33202599615   |
| B | 2.04924829873    | -2.14602572761  | -1.05930745845  |
| B | 1.2645744816     | -3.28750045817  | -0.302438792791 |



|   |                |                |                 |
|---|----------------|----------------|-----------------|
| B | 3.32866416018  | 0.677655322184 | -1.15420139638  |
| B | 3.03268452599  | 1.61213181653  | 0.145771324715  |
| B | 0.472874421027 | -3.83563385265 | 0.933106565784  |
| B | 2.19365644215  | 0.117585052946 | -0.119611902535 |

structure matching polymerization for boron cluster 28\_5-23

|   |                  |                  |                  |
|---|------------------|------------------|------------------|
| B | -0.325542336469  | 0.137540415418   | -1.97987314393   |
| B | -0.0302781139515 | -0.282366850723  | -0.450573696603  |
| B | 1.51486022771    | 0.336330552955   | 0.049236764415   |
| B | 0.59646268074    | -0.505096441624  | 1.01888225641    |
| B | 1.06061263753    | 0.652587689159   | -1.42761568396   |
| B | -2.70759442235   | -0.0797456849874 | 6.12808154193    |
| B | -1.47936955325   | 0.121986468067   | 5.02225985485    |
| B | -5.21419747713   | -0.870861608489  | 0.633860440146   |
| B | 0.536469808018   | 1.31711482006    | 2.73867180328    |
| B | -4.00418831837   | -0.47455982419   | -0.381363982184  |
| B | -4.22672291294   | -0.631978627201  | 5.41746027468    |
| B | -6.29807137409   | -1.29366522406   | 1.77136025162    |
| B | -4.02916232636   | -0.324078984956  | 7.02047410727    |
| B | -3.12374140775   | -1.12469255264   | 2.786876262      |
| B | -2.49884535437   | -0.0649432252532 | -0.0161338167246 |
| B | -2.87589819185   | -0.68382464934   | 4.46642947362    |
| B | -4.76591188666   | -1.04473799222   | 2.32588845341    |
| B | -0.376816575261  | 0.733479291159   | 3.94581156312    |
| B | -1.70868745708   | -0.271941080023  | 3.38908103214    |
| B | -5.78611291029   | -1.269506228     | 4.98717733577    |
| B | -5.41646321077   | -0.900507182593  | 6.52405492104    |
| B | -4.3730272724    | -1.39415408953   | 3.93029561562    |
| B | 0.27986350658    | 1.15276003007    | 1.18670786751    |
| B | -6.10888639065   | -1.35841422592   | 3.3650302712     |
| B | -3.58800786778   | -0.567425872528  | 1.21825893245    |
| B | -1.01951937155   | 0.443608860606   | 0.521391321665   |
| B | -1.974359176     | -0.536023918815  | 1.67093598338    |
| B | -0.802104553987  | 0.507773398356   | 2.24368907194    |

structure matching polymerization for boron cluster 29\_1-28

|   |                 |                 |                 |
|---|-----------------|-----------------|-----------------|
| B | -0.628006189377 | 0.135073110594  | 0.367319680751  |
| B | -1.08052803909  | 2.69487632415   | 1.67971089605   |
| B | -1.12267944248  | -1.32235173638  | -0.199939041377 |
| B | 1.09035732716   | 0.474796670699  | 0.164804203568  |
| B | -0.308458748454 | 4.05996473582   | 2.12677529933   |
| B | 1.59979654326   | -2.10761427638  | -1.0862285274   |
| B | -2.24822050531  | -0.282898028069 | 0.585368282841  |
| B | 3.84031721416   | -0.227888071414 | -0.783384414922 |

|   |                  |                 |                  |
|---|------------------|-----------------|------------------|
| B | 1.69048103126    | 1.94521662874   | 0.655482419699   |
| B | -1.66155404649   | 1.22197835153   | 1.14003089814    |
| B | -0.556937407569  | -4.03248572734  | -1.41810392171   |
| B | 3.3903824372     | 2.37051591778   | 0.437660303595   |
| B | 2.1674146894     | -0.620696463272 | -0.584167709315  |
| B | -1.61342513671   | -2.82244629113  | -0.717435421128  |
| B | 1.06479937868    | -3.6428894626   | -1.62967506382   |
| B | 0.520401200528   | -0.984871632641 | -0.380107994311  |
| B | 2.73409962708    | 0.863653305203  | -0.0832939526163 |
| B | -2.82118204516   | -1.75127129651  | 0.0436167007367  |
| B | -0.0309022428627 | -2.45367686068  | -0.914820454456  |
| B | -3.17102599611   | -3.2329406207   | -0.523453915095  |
| B | -2.16173461559   | -4.2706232415   | -1.19473018404   |
| B | 0.00409906466611 | 1.54960243107   | 0.886377035227   |
| B | 0.65883705671    | 2.98552240574   | 1.39609081042    |
| B | 2.33960911043    | 3.45237109408   | 1.1906294217     |
| B | 1.22707767742    | 4.41748850571   | 1.91058191966    |
| B | 4.31130819513    | 1.23611938951   | -0.283876075331  |
| B | 2.62968359199    | -3.19026732306  | -1.73562533028   |
| B | 3.25787589806    | -1.76486185147  | -1.29783873284   |
| B | -3.18212062561   | 1.11541389556   | 0.052236007146   |

structure matching polymerization for boron cluster 30\_2-28

|   |                 |                 |                 |
|---|-----------------|-----------------|-----------------|
| B | 1.02350221181   | -1.33308899068  | -1.24397130276  |
| B | 2.75444940365   | -1.10582158904  | -1.2060187543   |
| B | -0.571279684109 | -1.82107444224  | -1.2420122271   |
| B | 1.67373217203   | 0.215046542912  | -1.10332630731  |
| B | 3.21568649047   | 0.0825194094749 | -0.165639433    |
| B | -3.33713813689  | 0.923778596742  | 1.2249895698    |
| B | 0.650205794023  | -2.86068654886  | -1.95544358439  |
| B | -0.449600121166 | 2.58117067923   | 1.61334362413   |
| B | -0.666306626924 | 1.71566255911   | 0.110100112699  |
| B | 2.17937784208   | -2.40572392731  | -1.88879545882  |
| B | -3.57375427188  | -1.77311431434  | -0.568764139502 |
| B | 3.47048338623   | 1.13998324918   | 1.0155258865    |
| B | -1.94679674056  | 1.88713421      | 1.15196384333   |
| B | -2.12774382184  | -2.44992301084  | -1.29423930784  |
| B | -3.38671987861  | -0.381833529928 | 0.22587723654   |
| B | -1.97541173946  | -0.944187366167 | -0.547807059489 |
| B | 2.39776166603   | 2.11976463257   | 1.64305466221   |
| B | -0.876875154951 | -3.39846930877  | -1.96019822884  |
| B | -1.93513949871  | 0.50760344104   | 0.172203793353  |
| B | -3.13398370215  | 2.07522530179   | 2.30938854275   |
| B | -1.76709223268  | 2.80984804464   | 2.74969499761   |

|   |                 |                 |                 |
|---|-----------------|-----------------|-----------------|
| B | -0.268364069521 | 3.26014287114   | 3.10537948135   |
| B | 1.08228544554   | 2.88461689461   | 2.32426991146   |
| B | 2.15043023594   | 1.40064020237   | 0.0615776678957 |
| B | -2.40456309968  | -3.93519033901  | -1.95966657209  |
| B | -3.61805707397  | -3.17947685391  | -1.34737819512  |
| B | 0.66533748272   | 1.43112831223   | -0.775523066672 |
| B | 0.867890193234  | 2.19695553341   | 0.703999926804  |
| B | 5.34545229121   | -1.23211137629  | -1.23848841391  |
| B | 4.77119756132   | -0.445164156562 | 0.0615932194103 |

structure matching polymerization for boron cluster 31\_1-30

|   |                  |                 |                 |
|---|------------------|-----------------|-----------------|
| B | -0.256260958246  | 0.514014134221  | -0.620020967865 |
| B | -0.062208003259  | -1.15851089771  | -0.894863330808 |
| B | 2.59017848575    | -0.363055994728 | 4.34733844783   |
| B | 1.1360552709     | -3.85900159354  | -0.165090806116 |
| B | 2.67281234934    | -1.90959770636  | 4.03793928197   |
| B | 0.601665033898   | 1.37723376344   | 0.685163898304  |
| B | 1.96472735154    | 0.770563618505  | 3.34411997614   |
| B | 0.327109456812   | 3.09333764293   | -0.215096684948 |
| B | 1.39189027491    | -1.50544663257  | 1.51670249663   |
| B | 2.18554140353    | -2.66533547858  | 2.70807059443   |
| B | 0.5775988093     | -0.419815092892 | 0.460454123     |
| B | 2.01551838967    | -0.907493875387 | 2.92758144432   |
| B | -0.293549844587  | -1.73756214617  | -2.51518374702  |
| B | 0.233566178769   | -2.80703717349  | -1.22184835296  |
| B | 1.35911635862    | 1.83146363474   | 2.24358182147   |
| B | 0.851200106992   | 2.94511086672   | 1.21825226286   |
| B | 1.29203082033    | 0.172736740332  | 1.85397866414   |
| B | 1.63154721321    | -3.23513770732  | 1.28108107363   |
| B | 0.910941904965   | -2.17331153382  | 0.115888441293  |
| B | 0.0483004396858  | -3.34361049062  | -2.79325649094  |
| B | 0.749111117516   | -4.49260743116  | -1.62822735513  |
| B | -0.575803800812  | 2.49703545221   | -3.17423312133  |
| B | -0.235226321182  | 3.05739696357   | -1.75216952885  |
| B | -0.368772189105  | -2.32703306781  | -4.17348095878  |
| B | -0.513373086522  | -0.141030886478 | -2.24600378718  |
| B | 0.476444781191   | -4.88073820562  | -3.17023731486  |
| B | 0.00666467468616 | -3.9067842937   | -4.32376966994  |
| B | -0.633505334474  | -0.725978093381 | -3.84481120026  |
| B | -0.760039417907  | 0.926003534517  | -3.54894279861  |
| B | -0.716972269205  | 1.441861795     | -1.90779921507  |
| B | -1.0795366411    | 1.3885519711    | 0.664611427051  |

structure matching polymerization for boron cluster 32\_1-31

|   |                 |                 |                  |
|---|-----------------|-----------------|------------------|
| B | 0.537190379551  | -0.423101161617 | 1.32569334288    |
| B | 2.70636675148   | -1.78626113959  | 2.61984966554    |
| B | -0.827665112921 | 0.54673865841   | 1.69951122316    |
| B | 0.894882427474  | -1.004321588    | -0.186467131246  |
| B | 3.26561948885   | -2.5784159304   | 1.43753862343    |
| B | 0.0267573869784 | -0.722605715403 | -3.06661213566   |
| B | 0.335036704855  | 0.319304684557  | 2.87858925152    |
| B | 2.19931538846   | -2.46639774763  | -2.58459821416   |
| B | 2.14153660618   | -2.07997968741  | -0.630624931978  |
| B | 1.52161200197   | -0.757718104084 | 2.73812827568    |
| B | -1.89969550921  | 1.01256201527   | 0.540942251697   |
| B | 3.48933094208   | -3.09639515927  | -0.0429834801183 |
| B | 1.15051455649   | -1.73188299265  | -3.46872445062   |
| B | -2.91545801505  | 2.33706599363   | 0.847901039519   |
| B | -2.78525172321  | 1.67475778265   | -0.765914964961  |
| B | -1.43476719951  | 0.740062275949  | -1.05365881781   |
| B | 3.19311443928   | -3.11175426602  | -1.5215238627    |
| B | -1.65507998308  | 2.05391765407   | 1.8778438426     |
| B | 1.01444408894   | -1.40239524747  | -1.81954811914   |
| B | -3.5035791191   | 2.52253462602   | -2.10980878017   |
| B | -0.737482004576 | 1.51008871054   | 3.18944475738    |
| B | -1.78850904865  | 2.6877703789    | 3.3980516842     |
| B | -2.80072596545  | 3.29072646562   | 2.32063938821    |
| B | 1.87896379603   | -1.46163064532  | 1.15433860998    |
| B | -3.59143257594  | 3.10416264028   | -0.453598898569  |
| B | -3.77116405615  | 3.87126111603   | 1.09551335415    |
| B | -2.36093459706  | 1.37457811833   | -2.37742457502   |
| B | -0.156249724784 | -0.277656471993 | -1.3763633157    |
| B | -1.17614284034  | 0.30067370826   | -2.65785155045   |
| B | -4.42932669967  | 3.78830310084   | -1.67946605148   |
| B | -4.55023221999  | 4.40626458108   | -0.21796611556   |
| B | 4.90780941429   | -3.87023060348  | -0.340123262779  |

structure matching polymerization for boron cluster 33\_2-31

|   |                 |                 |                 |
|---|-----------------|-----------------|-----------------|
| B | -3.29689371358  | -2.60051721643  | -0.841044075232 |
| B | -3.36552954398  | -1.70482689259  | -2.2195969142   |
| B | 1.53073262405   | 0.729967211341  | 0.85675512426   |
| B | -2.61396643529  | 0.719844583347  | -3.52814313873  |
| B | 1.00124814584   | 1.75177765585   | -0.366249525783 |
| B | -2.07415376056  | -2.17894954841  | 0.291041977157  |
| B | 1.07314777645   | 0.0523226793085 | 2.44744592179   |
| B | -2.28660163212  | -2.90935132941  | 1.82682861747   |
| B | -0.729477163597 | -0.341230939032 | -1.59350916896  |
| B | 0.597745325492  | 2.7357533787    | -1.55047996912  |

|   |                 |                  |                 |
|---|-----------------|------------------|-----------------|
| B | -2.03437998458  | -1.42462251111   | -1.18225785444  |
| B | 0.228581765363  | -0.559534685547  | 1.13952646685   |
| B | -3.74380515261  | -0.652979211574  | -3.42458247543  |
| B | -2.17282821853  | -0.535444745843  | -2.52082083483  |
| B | -0.160131159898 | -2.15400859917   | 4.20951714073   |
| B | -1.24952574051  | -2.41388756362   | 3.017630351     |
| B | -0.973595251638 | -1.75580121058   | 1.44908371016   |
| B | -1.70495202497  | 2.19338876482    | -3.73742426768  |
| B | -0.111237968784 | -1.15874604031   | 2.68490144684   |
| B | -0.207735917171 | 1.28259990589    | -1.42448807878  |
| B | -0.503141246543 | 2.52313225961    | -2.67266947639  |
| B | -1.13628302086  | 0.841915863416   | -2.74772251096  |
| B | -3.04050490465  | 1.85143486204    | -4.6228348228   |
| B | -3.95189228272  | 0.573602943295   | -4.45848789998  |
| B | 0.353197553082  | 0.0990844970126  | -0.379047746625 |
| B | -3.26555301319  | -3.28389355006   | 0.61686882023   |
| B | 0.953750275963  | -0.805460026228  | 3.92510035896   |
| B | 1.07437233267   | -1.84152388031   | 5.19746163336   |
| B | 2.27176314024   | -0.869737233168  | 4.8957189913    |
| B | 2.64542394261   | 0.530423097505   | 2.02196684253   |
| B | 2.5055384865    | -0.0069723341222 | 3.53577156065   |
| B | 2.81091089608   | 1.51254022777    | -0.888725054716 |
| B | 3.11460285499   | 1.23612478033    | 0.683099480413  |

structure matching polymerization for boron cluster 34\_1-33

|   |                 |                 |                 |
|---|-----------------|-----------------|-----------------|
| B | -1.22243642565  | 1.77766312605   | 1.27437310293   |
| B | -2.03415213841  | 4.50818925272   | 0.976014805172  |
| B | -1.71391723557  | 0.20135097708   | 0.986045557167  |
| B | 0.386895775584  | 2.34616145487   | 1.47663083413   |
| B | -0.580711230951 | 5.1171254127    | 0.695326484763  |
| B | 2.58501823024   | -1.10911478406  | -0.464026245138 |
| B | -2.84087366864  | 1.41797060288   | 1.36953729583   |
| B | 3.79305096846   | 1.83112326153   | -0.987514673764 |
| B | 1.85725722639   | 2.80839559015   | 0.743320226438  |
| B | -2.47563646507  | 3.00986214648   | 1.25644391563   |
| B | -0.657987585062 | -1.1558813326   | 0.575906575642  |
| B | 0.922941493733  | 5.44726084445   | 0.214359827926  |
| B | 3.35142724222   | 0.315795357531  | -0.664576636381 |
| B | -1.44786428824  | -2.64335001986  | 0.252874987917  |
| B | 0.0888499225164 | -2.42759107542  | -0.32628720238  |
| B | 1.02451613146   | -1.13181817473  | 0.23266503916   |
| B | 3.13737823055   | 3.15756492078   | -0.436836506869 |
| B | -2.32047220426  | -1.35631985398  | 0.990054039134  |
| B | 2.14205653339   | 0.0490805312627 | 0.646775405478  |

|   |                 |                  |                 |
|---|-----------------|------------------|-----------------|
| B | 0.84695962503   | -3.77109411114   | -0.948453615867 |
| B | -3.42158067877  | -0.0847628444233 | 1.27463009623   |
| B | -4.11942208627  | -1.53229303779   | 1.12773354403   |
| B | -3.07141517102  | -2.79469582929   | 0.526123415856  |
| B | 0.690281863248  | 3.95657278887    | 0.872339441215  |
| B | -0.686081552372 | -4.00587077278   | -0.585511621754 |
| B | -2.26095442815  | -4.15151391206   | -0.203043113786 |
| B | 1.72584853407   | -2.47614462117   | -0.732458845502 |
| B | -0.840109255687 | 3.47077961597    | 1.45930273143   |
| B | 2.1238696113    | 4.40977626754    | 0.0317737248851 |
| B | 2.89794466334   | 1.61341434043    | 0.382440144375  |
| B | 1.64028593823   | 1.32685477271    | 1.49078565833   |
| B | -3.82917952361  | -4.19972886813   | 0.178335018061  |
| B | -4.67331804901  | -3.00112858465   | 0.784119347186  |
| B | 0.804868425764  | -0.978907564191  | -1.29663926407  |

structure matching polymerization for boron cluster 34\_2-32

|   |                  |                 |                 |
|---|------------------|-----------------|-----------------|
| B | 0.74809437508    | 1.3216497853    | 3.04416480065   |
| B | 0.892353189888   | 3.05555383167   | 2.94433679828   |
| B | 0.112734455579   | -0.207603565793 | 3.11527017705   |
| B | 1.33799019566    | 1.94191643698   | 1.5865355861    |
| B | 1.08788643708    | 3.73238917845   | 1.48222681856   |
| B | -0.932802457468  | -2.21076706026  | -2.31830791984  |
| B | 0.0155303870672  | 0.837710166846  | 4.53348559679   |
| B | 0.157836504677   | 0.973850831049  | -2.5798634368   |
| B | 0.564190552246   | 0.113062243623  | -1.16665769151  |
| B | 0.424255903597   | 2.35581783509   | 4.30306886527   |
| B | -0.30428590171   | -2.83320426029  | 2.00440039545   |
| B | 0.920250775065   | 4.34065792677   | 0.0128247803296 |
| B | -0.0638207488753 | -0.70987357622  | -2.49686521523  |
| B | -0.235713477174  | -1.80536921112  | 3.3644961218    |
| B | -0.84044907928   | -2.93864664281  | -0.837529513145 |
| B | -0.265550463658  | -2.08060219941  | 0.48702458754   |
| B | 0.59550134209    | 3.55185359047   | -1.33133922086  |
| B | -0.478005794518  | -0.760555149301 | 4.70398611045   |
| B | -0.159107518353  | -1.41026880702  | -0.960663585808 |
| B | -1.07323611429   | -1.34179673779  | -3.64440470591  |
| B | -0.739206836128  | 0.213573041108  | -3.89614403006  |
| B | -0.466647407294  | 1.80255826714   | -3.86662582863  |
| B | 0.11167632029    | 2.68960996872   | -2.68951614913  |
| B | 1.03712455407    | 2.68755877904   | 0.0953840463864 |
| B | -1.05094076545   | -2.23794575261  | 4.73913798384   |
| B | -1.19801691657   | -3.28146861981  | 3.5204489042    |
| B | 1.05246228552    | 0.974900517176  | 0.19781239422   |

|   |                 |                |                |
|---|-----------------|----------------|----------------|
| B | 0.522354518695  | 1.79837461003  | -1.20091832353 |
| B | 0.383967292381  | -1.30223838383 | 1.85632167826  |
| B | 0.954887196042  | 0.277011813669 | 1.69922206363  |
| B | -1.08043057546  | -3.62293044368 | 0.644068161769 |
| B | -1.39784532145  | -4.07523647575 | 2.1363500586   |
| B | 0.293184211596  | 0.140827659462 | -5.50923328208 |
| B | -0.643131520633 | -1.16326760957 | -5.26040592505 |

structure matching polymerization for boron cluster 35\_1-34

|   |                 |                 |                  |
|---|-----------------|-----------------|------------------|
| B | 1.1343572169    | -2.54119521392  | -2.73248159477   |
| B | 0.0639275227781 | -3.78223235625  | -3.22054476788   |
| B | 2.06526791443   | -1.17303727463  | -2.42271950583   |
| B | 0.0844245124159 | -3.13956561611  | -1.57067182841   |
| B | -1.17734337709  | -4.21754686333  | -2.18939891041   |
| B | -0.506570151859 | 1.76006861814   | 1.44458587952    |
| B | 1.97293642434   | -1.83101391921  | -4.05917920656   |
| B | -2.28161332902  | -1.09439478393  | 1.46074785837    |
| B | -0.626002871516 | -1.15068153501  | 1.04833908168    |
| B | 1.06411317641   | -3.13412037103  | -4.26770823358   |
| B | 2.06778622825   | 1.36001278382   | -0.942431665724  |
| B | -2.4973021672   | -4.3560767197   | -1.32017168479   |
| B | -1.29315699792  | 0.258161991669  | 1.75894497642    |
| B | 2.41438476106   | 0.469299968197  | -2.344529599     |
| B | 1.16749056803   | 2.31059946871   | 0.15981379949    |
| B | 1.48849598314   | 0.598772637462  | 0.375499372508   |
| B | -2.91152743918  | -3.49428299274  | -0.0425976288212 |
| B | 2.59737299768   | -0.307698413019 | -3.86811133949   |
| B | 0.282063447104  | 0.196769505826  | 1.34735513496    |
| B | -2.23902458289  | 1.76535484254   | 1.89622878901    |
| B | -3.02563680076  | 0.320099544324  | 2.04533497184    |
| B | -3.89620893473  | -0.993456600375 | 1.76832769343    |
| B | -3.40059923471  | -2.31648637371  | 1.01452990472    |
| B | -1.32024726665  | -3.39991546849  | -0.686894537114  |
| B | 2.93569474217   | 1.24856645742   | -3.69366348558   |
| B | 2.61283614253   | 2.15842795977   | -2.42010358981   |
| B | -0.187776688909 | -2.21702892218  | -0.163633782665  |
| B | -1.67578247424  | -2.43489415818  | 0.656409692803   |
| B | 1.80594246509   | -0.327305735238 | -0.962366020535  |
| B | 1.05909064914   | -1.80226569544  | -1.18875921766   |
| B | -1.48014275211  | 3.07093206091   | 1.55563138716    |
| B | -0.116812942684 | 3.31913108747   | 0.760226057617   |
| B | 0.980466745484  | 3.87910373042   | -0.265963757205  |
| B | 1.8685164458    | 3.10091072217   | -1.27475742613   |
| B | 0.123419347763  | 2.27578806927   | 2.84136261994    |

structure matching polymerization for boron cluster 36\_1-35

|   |                 |                 |                   |
|---|-----------------|-----------------|-------------------|
| B | 2.89924115132   | 2.74229556516   | 0.410175307733    |
| B | 2.47376231442   | 3.42844291096   | 1.93022088679     |
| B | 3.06985582126   | 2.25539436155   | -1.18417901423    |
| B | 2.01062279622   | 1.81000767936   | 1.47811321026     |
| B | 1.40862676344   | 2.60244936421   | 2.89562575231     |
| B | -0.379836570131 | -0.977923107137 | -2.71067400838    |
| B | 3.50514553272   | 3.9009487868    | -0.685895404551   |
| B | 0.714006755429  | -1.13160000831  | 0.467819921306    |
| B | 1.04421186517   | 0.932162871893  | 2.55428757271     |
| B | 3.24301296062   | 4.29450514078   | 0.822151511875    |
| B | 2.13040254811   | 0.922116922068  | -1.71074276067    |
| B | 0.194187546035  | 1.88892282943   | 3.62636699651     |
| B | 0.30561698897   | -1.25591279336  | -1.15344957159    |
| B | 2.72869668602   | 2.08729969393   | -2.81506724578    |
| B | -2.0035805434   | -1.42054274726  | -3.12618370941    |
| B | 2.31059074737   | 1.20131579159   | -0.0819026788971  |
| B | -1.33901777753  | -0.726741552824 | 2.46748191376     |
| B | 3.07986619621   | 3.32540874717   | -3.83897478217    |
| B | 1.55149584228   | 0.205424958516  | 1.03642417688     |
| B | 1.80398410447   | 0.801770220176  | -3.38183344834    |
| B | 1.05343390957   | 1.06269929723   | -4.95937862549    |
| B | 2.2246311432    | 2.12893095838   | -4.4524562491     |
| B | 3.46227939059   | 3.54946715044   | -2.3078893267     |
| B | -0.250793839369 | 0.227101434461  | -5.29084932951    |
| B | -1.06403355437  | -0.724034670636 | -4.29533704592    |
| B | 1.09182512615   | -0.260525869146 | -2.25525297844    |
| B | 0.479584260212  | -0.113583057799 | -3.85992723787    |
| B | -0.549989553532 | 0.538683421019  | 3.22530233974     |
| B | -2.93605422547  | -1.80855097308  | -1.90100825716    |
| B | -2.04257156906  | -1.55620532134  | 1.20408766955     |
| B | -1.29980122215  | -1.83136685294  | -1.57492589327    |
| B | 0.316194014181  | -0.442364227622 | 2.02327150649     |
| B | -2.57195620771  | -1.86857327502  | -0.352355802426   |
| B | -0.821259866352 | -1.83320496899  | -0.00036035088772 |
| B | -0.444330417515 | -1.79990675872  | 1.57472221577     |
| B | -2.7789518054   | -2.24708572667  | 2.65972665143     |

structure matching polymerization for boron cluster 36\_2-34

|   |                |                |                |
|---|----------------|----------------|----------------|
| B | 2.18010736184  | -2.70254329405 | 1.18978330912  |
| B | 1.71160751116  | -4.29240840992 | 1.61053903743  |
| B | 2.5997365334   | -1.21008811732 | 0.533359414676 |
| B | 0.797672397444 | -2.86528139444 | 2.12391265523  |



|   |                  |                  |                  |
|---|------------------|------------------|------------------|
| B | 0.206640556408   | -4.52567307013   | 2.29914343018    |
| B | -1.99347950988   | 1.76765336987    | 0.0762662336639  |
| B | 3.44829513326    | -2.67302643752   | 0.0242243688457  |
| B | -3.06022179885   | -0.857951485986  | 1.88382282583    |
| B | -1.43703898372   | -0.351717545285  | 2.03646597302    |
| B | 2.98625232634    | -4.05190850146   | 0.697077379673   |
| B | 1.4580364786     | 1.28469165879    | -0.505965310149  |
| B | -1.33047865308   | -4.71106859334   | 2.64545360073    |
| B | -2.58341794684   | 0.64528229539    | 1.2448208257     |
| B | 2.59831643244    | 0.0315469258569  | -0.599604952003  |
| B | -0.0113023105761 | 2.12461869281    | -0.760245641754  |
| B | 0.422628425227   | 1.34244365301    | 0.749662357678   |
| B | -2.46101491814   | -3.58514624835   | 2.67100939652    |
| B | 3.6427800341     | -1.30396996102   | -0.889437539535  |
| B | -1.0281524614    | 1.11021370271    | 1.38440141749    |
| B | -3.6936641629    | 1.21680853197    | -0.0302688667708 |
| B | -4.20940479628   | 0.0280574324618  | 0.994736857413   |
| B | -4.6028446192    | -1.38114052694   | 1.64236702578    |
| B | -3.59401964217   | -2.43354348394   | 2.3049136611     |
| B | -0.799558866518  | -3.15849960786   | 2.55382255496    |
| B | 3.59731633659    | -0.0620112405535 | -1.90053871764   |
| B | 2.53886394229    | 1.13535273077    | -1.89433500003   |
| B | -0.286889133572  | -1.5534790681    | 2.21236857578    |
| B | -1.9295580907    | -1.89943694415   | 2.55302914759    |
| B | 1.5113910392     | 0.0927560117054  | 0.71569177088    |
| B | 1.22304185553    | -1.32665507778   | 1.54435051018    |
| B | -3.0831362674    | 2.18709014722    | -1.07058101812   |
| B | -1.56358306591   | 2.50727267863    | -1.44658870257   |
| B | -0.203101746104  | 2.75227816331    | -2.25882050562   |
| B | 1.18165361907    | 2.07168447057    | -2.08239460389   |
| B | 1.64155842918    | 3.80858005455    | -3.91261859873   |
| B | 0.203284018107   | 4.07680833618    | -3.20644087172   |

structure matching polymerization for boron cluster 3\_1-2

|   |                 |                 |                  |
|---|-----------------|-----------------|------------------|
| B | -0.239891375931 | 0.222619027045  | -0.180743046704  |
| B | 0.625516592876  | -1.24639023717  | -0.0188917073089 |
| B | 0.880909585766  | -0.151572190212 | 1.15388897891    |

structure matching polymerization for boron cluster 4\_1-3

|   |                 |                 |                 |
|---|-----------------|-----------------|-----------------|
| B | 0.526286880078  | 0.0427580196695 | -0.114758989139 |
| B | -2.20841839401  | -0.119006527132 | 0.251990705465  |
| B | -0.869249425388 | 0.681003425091  | 0.33448820406   |
| B | -0.838740031528 | -0.880184278764 | 0.267509709689  |

structure matching polymerization for boron cluster 4\_2-2

|   |                 |                 |                 |
|---|-----------------|-----------------|-----------------|
| B | -0.108696108471 | 0.152298277731  | -0.785426109295 |
| B | 0.208922523524  | -0.288112422113 | 0.745724926625  |
| B | -1.26346353395  | 1.523717796     | -0.345603469454 |
| B | -0.686402529002 | 1.11849374932   | 1.11797459245   |

structure matching polymerization for boron cluster 5\_1-4

|   |                  |                 |                 |
|---|------------------|-----------------|-----------------|
| B | -0.0784269090932 | 0.78174039119   | 0.171073436177  |
| B | -0.093241650473  | -1.56160001309  | -0.129539236677 |
| B | -1.37145681498   | -1.22676241886  | 0.850213432565  |
| B | 1.12230636168    | -1.67263791945  | -1.04499088166  |
| B | 0.812158834388   | -0.221520380361 | -0.700390391644 |

structure matching polymerization for boron cluster 5\_2-3

|   |                 |                 |                  |
|---|-----------------|-----------------|------------------|
| B | 0.940477274859  | -1.00137783803  | 0.253437047299   |
| B | 0.503788237287  | 0.460664946916  | 0.811111014932   |
| B | -1.75124272655  | 0.562654707064  | -1.27495477095   |
| B | -0.851744578063 | 0.904304517106  | -0.0443558210025 |
| B | -0.488278917926 | -0.309632207541 | -0.959218833121  |

structure matching polymerization for boron cluster 6\_1-5

|   |                 |                  |                  |
|---|-----------------|------------------|------------------|
| B | -0.270598879161 | 0.209073522959   | 0.520467865339   |
| B | 1.13012786242   | -1.69208990966   | -2.76251930325   |
| B | 1.36183319069   | -0.969356076977  | -1.33906283366   |
| B | 0.132401795208  | 0.229653343525   | -1.07274662599   |
| B | 1.27384120031   | -0.0476577877537 | -0.0182892097968 |
| B | 0.0619093816347 | -0.580262413294  | -2.42423465411   |

structure matching polymerization for boron cluster 6\_2-4

|   |                 |                 |                 |
|---|-----------------|-----------------|-----------------|
| B | 1.24093170183   | 0.382539106094  | -0.428189261943 |
| B | 0.348100868581  | -0.180151783461 | 0.806921559292  |
| B | -2.6329034547   | -0.997151642661 | -0.444748294904 |
| B | -1.9078018208   | 0.305931766647  | -0.929456000594 |
| B | -0.500723145178 | 0.598036917456  | -0.302124754338 |
| B | -1.22582477908  | -0.705046491852 | 0.182582951351  |

structure matching polymerization for boron cluster 6\_3-3

|   |                 |                 |                 |
|---|-----------------|-----------------|-----------------|
| B | 0.842544808298  | 0.136369075527  | 1.32802250616   |
| B | -0.211783297657 | 1.00464167531   | 0.569939248908  |
| B | 0.89138806329   | 0.244040834131  | -0.234562644985 |
| B | -1.28565605656  | -1.38916408334  | -0.824950501505 |
| B | -1.03495460697  | 0.112181500082  | -0.473801658725 |
| B | 0.108187586983  | -0.736170487426 | -1.11897513786  |

structure matching polymerization for boron cluster 7\_1-6

|   |                 |                 |                |
|---|-----------------|-----------------|----------------|
| B | 0.191649885981  | -0.517184395263 | -0.41751063721 |
| B | -1.87582115541  | 0.745461662133  | 1.03777092409  |
| B | -0.8347812708   | 1.28954230197   | 2.06872960343  |
| B | -1.57561141522  | 0.455850153331  | -0.44950485396 |
| B | -0.254107304656 | 1.04934349004   | 0.459394602045 |
| B | 0.667159321111  | 1.64393768835   | 1.8211352017   |
| B | 1.39342766177   | 1.50764960686   | 0.46459300186  |

structure matching polymerization for boron cluster 7\_2-5

|   |                 |                 |                 |
|---|-----------------|-----------------|-----------------|
| B | 0.660939459767  | -0.224033743066 | -0.648670551751 |
| B | 0.223104293535  | -0.737290134668 | 0.829211350978  |
| B | -0.347773428075 | 0.674062993713  | -1.70539189918  |
| B | -0.284772349235 | 1.0338630873    | -0.134139332095 |
| B | -1.88952634454  | 1.28236368879   | 0.484780319184  |
| B | -0.610046057259 | 1.40911264072   | 1.40049354901   |
| B | -1.76009074486  | 0.920466923888  | -1.04483720188  |

structure matching polymerization for boron cluster 7\_3-4

|   |                |                 |                 |
|---|----------------|-----------------|-----------------|
| B | -1.3471413601  | 0.423316312183  | -0.503537083338 |
| B | 0.128656532262 | 0.911248908457  | -0.348174121708 |
| B | -0.40713447703 | -0.24401244984  | 0.557929170901  |
| B | 1.16228869561  | -1.48388335089  | 1.47335768061   |
| B | 1.31253817401  | -0.261032713952 | 0.503408339133  |
| B | 1.8924453417   | -0.565396365748 | -0.921305932357 |
| B | 1.7421958633   | -1.78824700268  | 0.0486434091232 |

structure matching polymerization for boron cluster 8\_1-7

|   |                 |                  |                 |
|---|-----------------|------------------|-----------------|
| B | -0.488792947502 | -0.0451661425961 | 0.505086975603  |
| B | 2.51732525383   | 1.03718678675    | -2.78222867021  |
| B | 1.9680808949    | -1.22617150246   | -1.15580049188  |
| B | 0.839602839094  | -0.570597043124  | -0.305571901273 |
| B | 0.198611509823  | 0.507423510698   | -1.22924744936  |
| B | 2.78751943154   | -0.439200848519  | -2.36718750739  |
| B | 1.01967076608   | 1.29278813433    | -2.44052078299  |
| B | 1.86342137062   | 0.432956348467   | -1.28683762689  |

structure matching polymerization for boron cluster 8\_2-6

|   |                  |                 |                 |
|---|------------------|-----------------|-----------------|
| B | 0.0108191513245  | 1.06130712022   | -0.175196851601 |
| B | 0.497758510603   | 0.221015512023  | 1.12713442281   |
| B | -0.0597978413807 | -2.46693936595  | -0.105146014362 |
| B | -0.301520832853  | -2.25409921256  | -1.64998735695  |
| B | -0.290976817002  | -1.37867552479  | 0.973132585664  |
| B | -0.5773826526    | -0.845417655285 | -0.644323614529 |

|   |                 |                 |                |
|---|-----------------|-----------------|----------------|
| B | -0.779986412749 | -0.977248774323 | -2.42392372671 |
| B | -0.972560545895 | 0.403027974523  | -1.73177470535 |

structure matching polymerization for boron cluster 8\_3-5

|   |                  |                  |                  |
|---|------------------|------------------|------------------|
| B | 0.191346459735   | -1.1851318817    | -0.680737925789  |
| B | 0.873331321534   | -0.0274172293039 | 0.11599836644    |
| B | -0.0364262080963 | -1.05469353063   | 0.864175234906   |
| B | -1.95473582244   | 0.441199831755   | -0.496696740892  |
| B | -0.40296191363   | 0.849629576548   | -0.331038199387  |
| B | -0.270313006089  | 2.53528057906    | 0.070252760122   |
| B | 0.998683432556   | 1.60995005351    | -0.0881053114232 |
| B | -1.72473359879   | 1.95947439111    | -0.131143806644  |

structure matching polymerization for boron cluster 8\_4-4

|   |                 |                  |                  |
|---|-----------------|------------------|------------------|
| B | 0.895633399536  | 0.437454547238   | 0.875707692455   |
| B | 0.530062926908  | -0.674825279791  | 2.03115450218    |
| B | 1.03536746153   | 1.48883067836    | -0.221115321358  |
| B | -0.426665254174 | 1.17676125347    | 0.0717261219783  |
| B | 0.229239076452  | -1.52049622173   | -0.0576959108202 |
| B | 0.129820791431  | -0.0843075090256 | -0.679160549513  |
| B | -1.24643834335  | 0.306385622095   | -1.32104058681   |
| B | -1.14702005833  | -1.12980309061   | -0.699575948115  |

structure matching polymerization for boron cluster 9\_1-8

|   |                 |                 |                  |
|---|-----------------|-----------------|------------------|
| B | 0.232931590914  | 0.253589335289  | -0.0952092303119 |
| B | -1.12436206255  | 0.0493296534227 | 0.570763944722   |
| B | -3.28091262083  | -1.71259318331  | 0.177307811715   |
| B | -2.61192648484  | -0.324186909553 | 0.219235340201   |
| B | 0.0267192224694 | -2.39777321414  | 1.10576858343    |
| B | 0.0439823737108 | -0.878062504767 | 0.964636128777   |
| B | -2.64427799566  | -3.06817664382  | 0.472239965088   |
| B | -1.16920336733  | -3.38088577747  | 0.887401501326   |
| B | -1.5355992593   | -1.67367603056  | 0.628382915977   |

structure matching polymerization for boron cluster 9\_2-7

|   |                 |                  |                   |
|---|-----------------|------------------|-------------------|
| B | 0.418851055049  | 0.475761361643   | -1.01970163673    |
| B | 0.421464292724  | 0.69642623817    | 0.58982216178     |
| B | -1.09018764667  | -1.52074390201   | 0.557706454359    |
| B | -0.575754405245 | -1.23610225789   | 2.08985028905     |
| B | -1.60462088809  | -1.80538554614   | -0.974437380329   |
| B | -1.38809623387  | -0.31897772707   | -0.492817006513   |
| B | -1.33504809541  | -3.02283023189   | -0.00830681901928 |
| B | -0.845327197928 | -0.0186575721343 | 1.12371972774     |
| B | -0.792279059466 | -2.72251007696   | 1.60822991523     |

structure matching polymerization for boron cluster 9\_3-6

|   |                  |                  |                 |
|---|------------------|------------------|-----------------|
| B | -0.20896358661   | -0.0306568007923 | 0.895540599038  |
| B | 0.478492533096   | 0.290615912244   | -0.469883589555 |
| B | -0.0903253401598 | -1.1406721513    | -0.204205787112 |
| B | -0.6307880525    | 3.97888725908    | -1.86214471112  |
| B | -1.2905374723    | 3.96256178071    | -0.44541334479  |
| B | 0.253056839723   | 2.84975178804    | -2.43648019552  |
| B | -0.342022198017  | 2.5782555957     | -0.856329432953 |
| B | -1.19593296075   | 2.84722947159    | 0.64537006447   |
| B | -0.404656779191  | 1.52932778862    | 0.492844518189  |

structure matching polymerization for boron cluster 9\_4-5

|   |                 |                 |                 |
|---|-----------------|-----------------|-----------------|
| B | 0.448747659562  | -0.176032592011 | -0.475670216807 |
| B | -0.277806290732 | 0.671189820638  | 0.640186924947  |
| B | 0.625907328446  | -1.47485859972  | 0.40311860261   |
| B | -0.100646621847 | -0.627636187067 | 1.51897574436   |
| B | -0.678761471139 | -0.256080164253 | -2.23830784938  |
| B | -0.224956034246 | 0.964279816735  | -1.28592031528  |
| B | -0.845361657258 | 2.46508658169   | -1.90456834632  |
| B | 0.0273179390802 | 2.39784092273   | -0.59095722993  |
| B | -1.19286205959  | 1.15792987441   | -2.71576340095  |
